# Supplementary material for: The complete chloroplast genome of Dendrobium nobile, an endangered medicinal orchid from north-east India and its comparison with related Dendrobium species
Source: PeerJ. 2019 Nov 1;7:e7756. doi: 10.7717/peerj.7756 (PMC6830405; doi:10.7717/peerj.7756)
Supplement: Table S2 [file peerj-07-7756-s002.xlsx]

## Sheet: Sheet1
Codon#	Codon#	Codon#	Codon#	Codon#	Codon#	Codon#	dS	dN	dN-dS	P-value	Normalized dN-dS
1	1768	GAT	0	1	0.521723	2.47828	0	0.403506	0.403506	0.826092	1.78057
2	1771	CTT	0	0	1	2	0	0	0	N/A	0
3	1774	GGT	0	0	1	2	0	0	0	N/A	0
4	1777	TTA	0	1	0.65657	1.74957	0	0.571568	0.571568	0.727128	2.52219
5	1780	TTC	0	0	0.395222	2.60478	0	0	0	N/A	0
6	1783	CAT	0	1	0.395222	2.47828	0	0.403506	0.403506	0.86246	1.78057
7	1786	TTT	0	0	0.395222	2.60478	0	0	0	N/A	0
8	1789	CAA	0	0	0.266154	2.33862	0	0	0	N/A	0
9	1792	GGA	0	0	1	1.65798	0	0	0	N/A	0
10	1795	CTC	0	0	1	2	0	0	0	N/A	0
11	1798	CCA	0	0	1	2	0	0	0	N/A	0
12	1801	AGC	0	0	0.395222	2.60478	0	0	0	N/A	0
13	1804	ACA	0	0	1	2	0	0	0	N/A	0
14	1807	CGT	0	0	1	2	0	0	0	N/A	0
15	1810	ATT	0	0	0.760334	2.23967	0	0	0	N/A	0
16	1813	AGC	1	2	0.395222	2.60478	2.53023	0.76782	-1.76241	0.952506	-7.77706
17	1825	TAT	0	0	0.395222	2	0	0	0	N/A	0
18	1828	AAC	0	1	0.395222	2.60478	0	0.38391	0.38391	0.868259	1.6941
19	1834	AAA	0	1	0.359282	2.20182	0	0.454171	0.454171	0.859716	2.00414
20	1840	GAT	0	2	0.402705	2.59729	0	0.770032	0.770032	0.749549	3.39796
21	1843	AGC	2	1	0.447597	2.41382	4.46831	0.414281	-4.05403	0.996172	-17.8894
22	1852	AAG	0	0	0.315963	2.24514	0	0	0	N/A	0
23	1855	GCT	0	0	1	2	0	0	0	N/A	0
24	1858	TGT	0	0	0.395222	2.23967	0	0	0	N/A	0
25	1864	TTA	0	2	0.649652	1.77221	0	1.12853	1.12853	0.535465	4.97994
26	1867	ACA	0	0	1	2	0	0	0	N/A	0
27	1870	GTA	0	0	1	2	0	0	0	N/A	0
28	1876	TAT	0	1	0.395222	2.1265	0	0.470256	0.470256	0.843273	2.07512
29	1879	GTC	0	0	1	2	0	0	0	N/A	0
30	1882	TTC	0	1	0.479259	2.32978	0	0.429225	0.429225	0.829387	1.89406
31	1885	TAT	0	0	0.395222	2	0	0	0	N/A	0
32	1888	GCC	0	2	1	2	0	1	1	0.444444	4.41275
33	1891	AAT	0	0	0.395222	2.60478	0	0	0	N/A	0
34	1894	GTC	0	0	1	2	0	0	0	N/A	0
35	1897	AAC	0	0	0.395222	2.60478	0	0	0	N/A	0
36	1900	CAA	0	0	0.266154	2.33862	0	0	0	N/A	0
37	1906	AAA	0	0	0.266154	2.29494	0	0	0	N/A	0
38	1912	ATA	0	1	0.872186	2.12781	0	0.469966	0.469966	0.709271	2.07384
39	1915	TCT	0	1	0.994395	2	0	0.5	0.5	0.667915	2.20637
40	1918	ATA	0	1	0.733179	2.26513	0	0.441476	0.441476	0.755469	1.94812
41	1933	ATG	0	1	0.0021186	2.99788	0	0.333569	0.333569	0.999294	1.47196
42	1936	ACC	0	1	1	2	0	0.5	0.5	0.666667	2.20637
43	1939	AAA	0	0	0.266154	2.29494	0	0	0	N/A	0
44	1942	ACT	0	2	0.998424	2.00158	0	0.999212	0.999212	0.445145	4.40927
45	1945	ATC	1	0	0.759591	2.24041	1.3165	0	-1.3165	1	-5.80938
46	1948	AGA	0.25	2.75	0.560711	2.00564	0.445863	1.37113	0.925272	0.577404	4.08299
47	1951	ACA	0	2	0.986507	1.99951	0	1.00024	1.00024	0.448397	4.41383
48	1954	ATT	0	0	0.760334	2.23967	0	0	0	N/A	0
49	1969	AAA	0	2	0.290928	2.34966	0	0.851185	0.851185	0.791788	3.75607
50	1999	AAA	0	1	0.277988	2.32335	0	0.430413	0.430413	0.893137	1.8993
51	2005	AGA	0	2	0.569119	2.01236	0	0.993859	0.993859	0.607679	4.38565
52	2008	TTC	2.25	2.75	0.399378	2.59577	5.63375	1.05941	-4.57434	0.985233	-20.1854
53	2032	TAT	0	0	0.395222	2	0	0	0	N/A	0
54	2035	GGG	1	0	1	1.92846	1	0	-1	1	-4.41275
55	2038	TTG	0	0	0.711184	1.9237	0	0	0	N/A	0
56	2041	ATG	0	0	0	3	0	0	0	N/A	0
57	2044	GGT	0	0	1	2	0	0	0	N/A	0
58	2047	TGC	0	0	0.395222	2.23967	0	0	0	N/A	0
59	2050	CCG	0	0	1	2	0	0	0	N/A	0
60	2053	GGA	0	0	1	1.65798	0	0	0	N/A	0
61	2056	CTC	0	1	0.992036	2.00796	0	0.498017	0.498017	0.669321	2.19762
62	2059	GAA	0	0	0.266154	2.39183	0	0	0	N/A	0
63	2062	CCC	0	0	1	2	0	0	0	N/A	0
64	2065	GGA	0	0	1	1.65798	0	0	0	N/A	0
65	2068	ACT	0	0	1	2	0	0	0	N/A	0
66	2071	AGT	0	0	0.395222	2.60478	0	0	0	N/A	0
67	2074	CGG	0	0	1.36511	1.63489	0	0	0	N/A	0
68	2077	ATG	0	0	0	3	0	0	0	N/A	0
69	2080	GAG	0	0	0.315963	2.34202	0	0	0	N/A	0
70	2086	ATA	0	0	0.733846	2.26615	0	0	0	N/A	0
71	2089	ATT	2	1	0.756985	2.24302	2.64206	0.445828	-2.19623	0.983934	-9.69143
72	2092	TTT	0	1	0.40077	2.59923	0	0.384729	0.384729	0.86641	1.69771
73	2095	CTT	0	2	1	2	0	1	1	0.444444	4.41275
74	2098	TGT	0	0	0.395222	2.23967	0	0	0	N/A	0
75	2101	TAC	0	3	0.388085	2.14613	0	1.39786	1.39786	0.607349	6.16842
76	2113	AAA	0	0	0.266154	2.29494	0	0	0	N/A	0
77	2116	AAG	1	1	0.316023	2.25314	3.16433	0.443824	-2.7205	0.98487	-12.0049
78	2119	ATC	0	0	0.760334	2.23967	0	0	0	N/A	0
79	2122	CCT	0	0	1	2	0	0	0	N/A	0
80	2125	CCC	0	0	1	2	0	0	0	N/A	0
81	2128	CAA	0	0	0.266154	2.33862	0	0	0	N/A	0
82	2131	ACC	0	0	1	2	0	0	0	N/A	0
83	2134	GTG	0	0	1	2	0	0	0	N/A	0
84	2137	CTT	0	0	1	2	0	0	0	N/A	0
85	2140	GCA	0	0	1	2	0	0	0	N/A	0
86	2143	GTT	0	0	1	2	0	0	0	N/A	0
87	2146	TTC	0	0	0.395222	2.60478	0	0	0	N/A	0
88	2149	ATT	0	0	0.760334	2.23967	0	0	0	N/A	0
89	2152	GCA	0	0	1	2	0	0	0	N/A	0
90	2155	CAC	0	0	0.395222	2.60478	0	0	0	N/A	0
91	2158	GAC	0	0	0.395222	2.60478	0	0	0	N/A	0
92	2161	TTT	0	0	0.395222	2.60478	0	0	0	N/A	0
93	2164	CCC	0	0	1	2	0	0	0	N/A	0
94	2167	TAT	0	0	0.395222	2	0	0	0	N/A	0
95	2170	GTA	0	0	1	2	0	0	0	N/A	0
96	2206	AAT	0	2	0.394025	2.60191	0	0.768667	0.768667	0.754257	3.39194
97	2242	ATT	0	0	0.760334	2.23967	0	0	0	N/A	0
98	2245	TTG	1	1	0.69596	1.89972	1.43686	0.526394	-0.91047	0.92811	-4.01768
99	2248	ACT	1	1	1	2	1	0.5	-0.5	0.888889	-2.20637
100	2251	ACT	0	0	1	2	0	0	0	N/A	0
101	2254	CAG	1	0	0.315501	2.28928	3.16956	0	-3.16956	1	-13.9865
102	2260	ATT	0	1	0.751422	2.24858	0	0.444726	0.444726	0.749526	1.96246
103	2266	CCA	0	0	1	2	0	0	0	N/A	0
104	2308	TAT	0	0	0.395222	2	0	0	0	N/A	0
105	2311	ATA	0	1	0.502135	2.49786	0	0.400342	0.400342	0.832622	1.76661
106	2314	AGC	0	0	0.395222	2.60478	0	0	0	N/A	0
107	2317	ATT	0	1	0.762073	2.23793	0	0.446842	0.446842	0.745976	1.9718
108	2320	TCA	0	0	1	1.39522	0	0	0	N/A	0
109	2323	GAA	0	0	0.266154	2.39183	0	0	0	N/A	0
110	2389	CAT	0	1	0.399199	2.6008	0	0.384497	0.384497	0.866934	1.69669
111	2398	TCC	0	0	1	2	0	0	0	N/A	0
112	2401	ACC	0	0	1	2	0	0	0	N/A	0
113	2404	AGA	0	0	0.561098	2	0	0	0	N/A	0
114	2407	TCA	0	0	1	1.39522	0	0	0	N/A	0
115	2410	TTG	0	1	0.645094	2.06616	0	0.483989	0.483989	0.762068	2.13572
116	2413	ATA	0	0	0.733846	2.26615	0	0	0	N/A	0
117	2416	CGG	0	1	1.35915	1.6386	0	0.610275	0.610275	0.546611	2.69299
118	2419	ATA	0	0	0.733846	2.26615	0	0	0	N/A	0
119	2422	ATG	0	1	0.0104417	2.98956	0	0.334498	0.334498	0.996519	1.47605
120	2425	TCC	0	0	1	2	0	0	0	N/A	0
121	2428	AAA	0	0	0.266154	2.29494	0	0	0	N/A	0
122	2431	TAC	0	0	0.395222	2	0	0	0	N/A	0
123	2434	CAA	0	0	0.266154	2.33862	0	0	0	N/A	0
124	2437	ATA	0	1	0.666562	2.33344	0	0.428552	0.428552	0.777813	1.89109
125	2440	CGT	0	0	1	2	0	0	0	N/A	0
126	2443	TCT	0	0	1	2	0	0	0	N/A	0
127	2446	CTA	1	0	1.39341	1.6051	0.717666	0	-0.717666	1	-3.16688
128	2449	TGT	0	1	0.392975	2.2404	0	0.44635	0.44635	0.850771	1.96963
129	2452	AAT	0	0	0.395222	2.60478	0	0	0	N/A	0
130	2455	CCG	0	0	1	2	0	0	0	N/A	0
131	2458	TGT	0	1	0.395222	2.2383	0	0.446767	0.446767	0.849927	1.97147
132	2461	AAA	1	1	0.279406	2.28339	3.57902	0.437946	-3.14108	0.988114	-13.8608
133	2473	AAA	0	1	0.274427	2.28667	0	0.437317	0.437317	0.892848	1.92977
134	2476	GGT	4	1	1	2	4	0.5	-3.5	0.995885	-15.4446
135	2479	ATT	0	1	0.810465	2.18954	0	0.456718	0.456718	0.729845	2.01538
136	2482	TTT	0	0	0.395222	2.60478	0	0	0	N/A	0
137	2485	TGG	0	1	0.00362563	2.3669	0	0.422494	0.422494	0.998471	1.86436
138	2488	AGG	0	1	0.565791	2.43421	0	0.410811	0.410811	0.811403	1.81281
139	2491	AAG	0	3	0.317717	2.25309	0	1.3315	1.3315	0.673175	5.87558
140	2494	ATT	0	1	0.601295	2.39871	0	0.416892	0.416892	0.799568	1.83964
141	2497	AAA	0	0	0.266154	2.29494	0	0	0	N/A	0
142	2500	GAA	0	1	0.266154	2.38693	0	0.418948	0.418948	0.899681	1.84871
143	2503	AGA	0	1	0.563556	2.00379	0	0.499055	0.499055	0.780491	2.20221
144	2506	GAT	0	3	0.521723	2.47273	0	1.21323	1.21323	0.563089	5.3537
145	2509	TGT	0	1	0.395222	2.24178	0	0.446074	0.446074	0.850125	1.96841
146	2512	TCT	0	0	1	2	0	0	0	N/A	0
147	2515	TCT	0	0	1	2	0	0	0	N/A	0
148	2518	TCA	1	0	1	1.58618	1	0	-1	1	-4.41275
149	2521	AAA	0	2	0.365818	2.29333	0	0.872094	0.872094	0.743786	3.84833
150	2524	AAG	1	0	0.297973	2.26312	3.35601	0	-3.35601	1	-14.8092
151	2527	AAT	0	0	0.395222	2.60478	0	0	0	N/A	0
152	2530	TCT	0	0	1	2	0	0	0	N/A	0
153	2533	TCT	0	1	0.996562	2.00136	0	0.49966	0.49966	0.667583	2.20487
154	2536	AAG	1	0	0.305544	2.25555	3.27285	0	-3.27285	1	-14.4423
155	2539	AAT	0	0	0.395222	2.60478	0	0	0	N/A	0
156	2542	CCC	0	2	1	2	0	1	1	0.444444	4.41275
157	2545	GAA	0	0	0.266154	2.39183	0	0	0	N/A	0
158	2548	CCT	2	0	1	2	2	0	-2	1	-8.8255
159	2551	AAC	1	0	0.395222	2.60478	2.53023	0	-2.53023	1	-11.1653
160	2554	CTT	0	0	1	2	0	0	0	N/A	0
161	2557	CGC	0	0	1	2	0	0	0	N/A	0
162	2560	ATA	0	0	0.733846	2.26615	0	0	0	N/A	0
163	2563	AAA	0	0	0.266154	2.29494	0	0	0	N/A	0
164	2566	GTG	0	0	1	2	0	0	0	N/A	0
165	2569	CGT	0	0	1	2	0	0	0	N/A	0
166	2572	ACT	0	0	1	2	0	0	0	N/A	0
167	2575	GTA	0	1	0.998075	1.99849	0	0.500379	0.500379	0.666927	2.20805
168	2578	CTT	0	0	1	2	0	0	0	N/A	0
169	2581	TTA	0	0	0.661376	1.73385	0	0	0	N/A	0
170	2584	TGT	0	0	0.395222	2.23967	0	0	0	N/A	0
171	2587	TTA	0	0	0.661376	1.73385	0	0	0	N/A	0
172	2590	CGA	0	0	1.36511	1.23967	0	0	0	N/A	0
173	2593	GCC	0	0	1	2	0	0	0	N/A	0
174	2596	AAA	0	0	0.266154	2.29494	0	0	0	N/A	0
175	2599	GTT	0	0	1	2	0	0	0	N/A	0
176	2602	CTA	0	0	1.39522	1.60478	0	0	0	N/A	0
177	2605	GCA	0	0	1	2	0	0	0	N/A	0
178	2608	CAC	0	0	0.395222	2.60478	0	0	0	N/A	0
179	2611	GAA	0	0	0.266154	2.39183	0	0	0	N/A	0
180	2614	AGT	0	0	0.395222	2.60478	0	0	0	N/A	0
181	2617	CGA	0	1	1.36596	1.24991	0	0.80006	0.80006	0.477818	3.53046
182	2620	AGT	0	0	0.395222	2.60478	0	0	0	N/A	0
183	2623	ATA	0	0	0.733846	2.26615	0	0	0	N/A	0
184	2626	TAC	1	0	0.395222	2	2.53023	0	-2.53023	1	-11.1653
185	2629	TTT	0	0	0.395222	2.60478	0	0	0	N/A	0
186	2632	ATA	0	0	0.733846	2.26615	0	0	0	N/A	0
187	2635	CGA	0	0	1.36511	1.23967	0	0	0	N/A	0
188	2638	TAC	0	0	0.395222	2	0	0	0	N/A	0
189	2641	AAA	0	0	0.266154	2.29494	0	0	0	N/A	0
190	2644	ACC	1	0	1	2	1	0	-1	1	-4.41275
191	2647	TGT	0	2	0.399199	2.31446	0	0.864132	0.864132	0.727426	3.8132
192	2650	TTC	1	0	0.395222	2.60478	2.53023	0	-2.53023	1	-11.1653
193	2653	TTT	0	0	0.395222	2.60478	0	0	0	N/A	0
194	2656	GAG	1	0	0.314566	2.34342	3.17899	0	-3.17899	1	-14.0281
195	2659	GAT	0	0	0.395222	2.60478	0	0	0	N/A	0
196	2662	CCG	0	0	1	2	0	0	0	N/A	0
197	2665	CTG	1	0	1.39026	1.60709	0.719291	0	-0.719291	1	-3.17405
198	2677	CAA	0	0	0.266154	2.33862	0	0	0	N/A	0
199	2680	AGA	0	0	0.561098	2	0	0	0	N/A	0
200	2683	TTT	0	0	0.395222	2.60478	0	0	0	N/A	0
201	2686	CTA	1	0	1.39522	1.60478	0.716732	0	-0.716732	1	-3.16276
202	2689	CAT	0	0	0.395222	2.60478	0	0	0	N/A	0
203	2692	ATC	0	1	0.683963	2.31604	0	0.431772	0.431772	0.772012	1.9053
204	2698	CAA	0	0	0.266154	2.33862	0	0	0	N/A	0
205	2701	AAT	0	0	0.395222	2.60478	0	0	0	N/A	0
206	2704	CGA	0	0	1.36511	1.23967	0	0	0	N/A	0
207	2707	TCA	0	1	0.995182	1.40004	0	0.714265	0.714265	0.584514	3.15187
208	2710	AGA	0	1	0.615643	2.08404	0	0.479838	0.479838	0.771957	2.1174
209	2713	ATA	1	0	0.734091	2.26591	1.36223	0	-1.36223	1	-6.01117
210	2716	TCA	0	0	1	1.39522	0	0	0	N/A	0
211	2719	GAA	0	0	0.266154	2.39183	0	0	0	N/A	0
212	2722	TCC	0	0	1	2	0	0	0	N/A	0
213	2725	GAT	0	0	0.395222	2.60478	0	0	0	N/A	0
214	2728	AAA	0	0	0.266154	2.29494	0	0	0	N/A	0
215	2731	TCG	1	0	1	1.63234	1	0	-1	1	-4.41275
216	2734	GTC	0	0	1	2	0	0	0	N/A	0
217	2737	CAG	1	1	0.317102	2.30032	3.15356	0.434722	-2.71884	0.985323	-11.9976
218	2740	ATC	2	0	0.760334	2.23967	2.63042	0	-2.63042	1	-11.6074
219	2743	GGT	0	0	1	2	0	0	0	N/A	0
220	2746	TTA	0	0	0.661376	1.73385	0	0	0	N/A	0
221	2749	CTA	0	0	1.39522	1.60478	0	0	0	N/A	0
222	2752	ATA	0	0	0.733846	2.26615	0	0	0	N/A	0
223	2755	GGA	0	0	1	1.65798	0	0	0	N/A	0
224	2761	CCC	0	0	1	2	0	0	0	N/A	0
225	2764	AAT	0	1	0.395222	2.60478	0	0.38391	0.38391	0.868259	1.6941
226	2767	ACA	0	1	0.944328	2.05567	0	0.486459	0.486459	0.685224	2.14662
227	2770	GTA	0	0	1	2	0	0	0	N/A	0
228	2773	CAA	0	0	0.266154	2.33862	0	0	0	N/A	0
229	2776	AAT	0	1	0.39396	2.60175	0	0.384357	0.384357	0.868492	1.69607
230	2782	TCT	0	1	1	2	0	0.5	0.5	0.666667	2.20637
231	2785	TTC	1	0	0.395222	2.60478	2.53023	0	-2.53023	1	-11.1653
232	2788	GAC	0	0	0.395222	2.60478	0	0	0	N/A	0
233	2791	AAT	0	0	0.395222	2.60478	0	0	0	N/A	0
234	2794	GAT	0	0	0.395222	2.60478	0	0	0	N/A	0
235	2797	CCA	0	0	1	2	0	0	0	N/A	0
236	2800	ATA	0	0	0.733846	2.26615	0	0	0	N/A	0
237	2803	AGA	0	0	0.561098	2	0	0	0	N/A	0
238	2806	GAA	1	1	0.271195	2.38679	3.68738	0.418973	-3.26841	0.98959	-14.4227
239	2809	ATA	1	1	0.730016	2.26569	1.36983	0.441366	-0.928467	0.940617	-4.09709
240	2812	ACT	0	1	0.999156	2.00084	0	0.499789	0.499789	0.666948	2.20544
241	2815	GGG	0	0	1	2	0	0	0	N/A	0
242	2818	GCT	0	1	1	2	0	0.5	0.5	0.666667	2.20637
243	2821	ATG	0	0	0	3	0	0	0	N/A	0
244	2824	GTA	0	0	1	2	0	0	0	N/A	0
245	2827	TCT	0	0	1	2	0	0	0	N/A	0
246	2830	AAT	0	1	0.394723	2.60358	0	0.384086	0.384086	0.868351	1.69488
247	2833	TTC	1	2	0.410726	2.55404	2.43472	0.783072	-1.65164	0.947741	-7.28829
248	2836	TTA	0	0	0.661376	1.73385	0	0	0	N/A	0
249	2839	GAT	2	1	0.586179	2.41382	3.41193	0.414281	-2.99764	0.99254	-13.2279
250	2842	AGA	0	0	0.561098	2	0	0	0	N/A	0
251	2845	GTA	0	0	1	2	0	0	0	N/A	0
252	2848	TTT	0	0	0.395222	2.60478	0	0	0	N/A	0
253	2851	ATT	0	0	0.760334	2.23967	0	0	0	N/A	0
254	2854	AGA	0.5	1.5	0.573643	1.99391	0.871622	0.752292	-0.11933	0.77658	-0.526576
255	2857	AAT	0	1	0.378643	2.52955	0	0.395327	0.395327	0.869801	1.74448
256	2860	GAA	0	0	0.266154	2.39183	0	0	0	N/A	0
257	2863	TTC	0	0	0.395222	2.60478	0	0	0	N/A	0
258	2866	TCT	1	0	1	2	1	0	-1	1	-4.41275
259	2869	AGC	0	0	0.395222	2.60478	0	0	0	N/A	0
260	2872	ATT	1	0	0.760334	2.23967	1.31521	0	-1.31521	1	-5.8037
261	2878	TTT	0	0	0.395222	2.60478	0	0	0	N/A	0
262	2881	CTT	0	0	1	2	0	0	0	N/A	0
263	2884	ACT	0	0	1	2	0	0	0	N/A	0
264	2887	ACC	0	1	0.995611	2.00439	0	0.498905	0.498905	0.66813	2.20154
265	2890	AAA	0	0	0.266154	2.29494	0	0	0	N/A	0
266	2896	TTT	0	0	0.395222	2.60478	0	0	0	N/A	0
267	2899	TTC	1	0	0.395222	2.60478	2.53023	0	-2.53023	1	-11.1653
268	2902	AGT	0	2	0.50476	2.485	0	0.804829	0.804829	0.690844	3.55151
269	2905	ACA	0	0	1	2	0	0	0	N/A	0
270	2908	CTT	0	1	0.995966	2.00403	0	0.498993	0.498993	0.668011	2.20193
271	2911	GAA	0	1	0.266154	2.37156	0	0.421663	0.421663	0.899097	1.86069
272	2914	AAG	2	2	0.298124	2.26562	6.70861	0.882759	-5.82585	0.994259	-25.708
273	2920	CCC	0	0	1	2	0	0	0	N/A	0
274	2923	AGA	0	1	0.562787	2.0026	0	0.49935	0.49935	0.780623	2.20351
275	2926	AAA	1	0	0.270721	2.29038	3.69384	0	-3.69384	1	-16.3
276	2929	GAG	0	0	0.315963	2.34202	0	0	0	N/A	0
277	2932	AAG	1	0	0.314566	2.24653	3.17899	0	-3.17899	1	-14.0281
278	2935	GAA	0	0	0.266154	2.39183	0	0	0	N/A	0
279	2941	TTG	0	1	0.716494	1.91839	0	0.52127	0.52127	0.728074	2.30023
280	2944	GTT	0	2	1	2	0	1	1	0.444444	4.41275
281	2947	AAT	0	0	0.395222	2.60478	0	0	0	N/A	0
282	2950	TGC	1	0	0.395222	2.23967	2.53023	0	-2.53023	1	-11.1653
283	2953	TTT	0	0	0.395222	2.60478	0	0	0	N/A	0
284	2956	ATA	0	0	0.733846	2.26615	0	0	0	N/A	0
285	2962	ATC	0	0	0.760334	2.23967	0	0	0	N/A	0
286	2965	CTA	0	0	1.39522	1.60478	0	0	0	N/A	0
287	2971	GGT	0	0	1	2	0	0	0	N/A	0
288	2977	AAC	0	2	0.403186	2.59681	0	0.770174	0.770174	0.749272	3.39859
289	2980	CAA	0	0	0.266154	2.33862	0	0	0	N/A	0
290	2983	AAG	1	0	0.315047	2.24605	3.17413	0	-3.17413	1	-14.0066
291	2989	AAA	0	0	0.266154	2.29494	0	0	0	N/A	0
292	2995	GAT	0	1	0.395222	2.60478	0	0.38391	0.38391	0.868259	1.6941
293	2998	TGC	0	0	0.395222	2.23967	0	0	0	N/A	0
294	3001	CAA	1	1	0.266611	2.33785	3.75078	0.427743	-3.32304	0.989521	-14.6637
295	3004	AAA	0	0	0.266154	2.29494	0	0	0	N/A	0
296	3007	TTC	0	1	0.396223	2.6015	0	0.384394	0.384394	0.867825	1.69623
297	3010	ACA	0	0	1	2	0	0	0	N/A	0
298	3013	AGA	0	1	0.652903	2	0	0.5	0.5	0.753891	2.20637
299	3019	AAT	0	1	0.368225	2.53997	0	0.393705	0.393705	0.873384	1.73732
300	3022	TCC	0	2	0.711244	2.28876	0	0.873837	0.873837	0.582045	3.85603
301	3025	CAT	0	0	0.395222	2.60478	0	0	0	N/A	0
302	3028	TTT	3	0	0.395222	2.60478	7.59068	0	-7.59068	1	-33.4958
303	3031	TTC	0	0	0.395222	2.60478	0	0	0	N/A	0
304	3034	ATC	1	0	0.760334	2.23967	1.31521	0	-1.31521	1	-5.8037
305	3037	AGA	0	0	0.561098	2	0	0	0	N/A	0
306	3040	ATA	0	1	0.725401	2.26667	0	0.441175	0.441175	0.757559	1.94679
307	3043	AGA	0	0	0.561098	2	0	0	0	N/A	0
308	3046	GTT	0	0	1	2	0	0	0	N/A	0
309	3049	CCT	1	0	1	2	1	0	-1	1	-4.41275
310	3052	TTT	0	0	0.395222	2.60478	0	0	0	N/A	0
311	3055	GAA	0	0	0.266154	2.39183	0	0	0	N/A	0
312	3058	GCC	0	0	1	2	0	0	0	N/A	0
313	3061	AGA	0	1	0.534056	2.02704	0	0.49333	0.49333	0.791474	2.17694
314	3064	ATT	1	1	0.747068	2.25293	1.33857	0.443866	-0.8947	0.937988	-3.94809
315	3067	GCT	0	1	1	2	0	0.5	0.5	0.666667	2.20637
316	3070	TTT	0	0	0.395222	2.60478	0	0	0	N/A	0
317	3073	CCT	0	0	1	2	0	0	0	N/A	0
318	3079	TAT	0	0	0.395222	2	0	0	0	N/A	0
319	3085	ACA	0	0	1	2	0	0	0	N/A	0
320	3091	TGT	0	0	0.395222	2.23967	0	0	0	N/A	0
321	3094	ATG	0	1	0.0132658	2.98673	0	0.334814	0.334814	0.995578	1.47745
322	3097	AAA	0	0	0.266154	2.29494	0	0	0	N/A	0
323	3100	GTA	0	1	1	1.92846	0	0.518549	0.518549	0.658524	2.28822
324	3103	TCC	1	1	0.983037	2.01696	1.01726	0.495795	-0.521461	0.892626	-2.30108
325	3106	TTG	0	0	0.711184	1.9237	0	0	0	N/A	0
326	3109	AGG	0	2	0.607758	2.37993	0	0.84036	0.84036	0.634539	3.7083
327	3112	AAC	0	0	0.395222	2.60478	0	0	0	N/A	0
328	3115	CAT	0	1	0.378643	2.53869	0	0.393904	0.393904	0.870209	1.7382
329	3118	AGG	1	2	0.58986	2.30762	1.69532	0.866694	-0.828622	0.892543	-3.6565
330	3121	ATC	1	0	0.760157	2.23984	1.31552	0	-1.31552	1	-5.80505
331	3124	CTC	0	0	1	2	0	0	0	N/A	0
332	3130	AAA	0	1	0.266848	2.2949	0	0.435749	0.435749	0.895834	1.92285
333	3139	CAA	0	1	0.266154	2.32949	0	0.429279	0.429279	0.897461	1.8943
334	3142	CAC	0	1	0.395222	2.47828	0	0.403506	0.403506	0.86246	1.78057
335	3145	ACG	1	0	1	2	1	0	-1	1	-4.41275
336	3148	ACT	0	0	1	2	0	0	0	N/A	0
337	3151	ATA	0	2	0.707123	2.20107	0	0.908648	0.908648	0.572825	4.00964
338	3154	AGA	0	2	0.59969	2.05946	0	0.971129	0.971129	0.59982	4.28535
339	3157	TAT	0	1	0.395222	2.1265	0	0.470256	0.470256	0.843273	2.07512
340	3160	TCT	2	1	0.997542	1.97188	2.00493	0.50713	-1.4978	0.962088	-6.6094
341	3163	CTT	0	1	0.761144	2.23886	0	0.446657	0.446657	0.746285	1.97098
342	3166	TTT	0	0	0.395222	2.60478	0	0	0	N/A	0
343	3169	CCA	0	1	1	2	0	0.5	0.5	0.666667	2.20637
344	3175	AAA	0	0	0.266154	2.29494	0	0	0	N/A	0
345	3178	TGT	0	4	0.408185	2.26602	0	1.76521	1.76521	0.515557	7.78942
346	3181	GTT	0	0	1	2	0	0	0	N/A	0
347	3184	CGC	2	0	1	2	2	0	-2	1	-8.8255
348	3187	TCA	0	0	1	1.39522	0	0	0	N/A	0
349	3190	AGA	0	1	0.565943	2.00747	0	0.498141	0.498141	0.78008	2.19817
350	3193	AAG	0	1	0.318186	2.25522	0	0.443415	0.443415	0.876356	1.95668
351	3196	ACT	0	0	1	2	0	0	0	N/A	0
352	3199	CCA	0	0	1	2	0	0	0	N/A	0
353	3205	GAT	0	0	0.395222	2.60478	0	0	0	N/A	0
354	3208	ATT	0	1	0.810465	2.18954	0	0.456718	0.456718	0.729845	2.01538
355	3211	GAT	0	0	0.395222	2.60478	0	0	0	N/A	0
356	3214	CGT	0	0	1	2	0	0	0	N/A	0
357	3217	AAA	0	0	0.266154	2.29494	0	0	0	N/A	0
358	3223	GAA	0	0	0.266154	2.39183	0	0	0	N/A	0
359	3226	GAC	0	2	0.370555	2.56408	0	0.780007	0.780007	0.763405	3.44197
360	3229	TGT	0	3	0.395222	2.31305	0	1.29699	1.29699	0.622986	5.72329
361	3232	TTA	0	0	0.661376	1.73385	0	0	0	N/A	0
362	3235	CGA	0	0	1.36511	1.23967	0	0	0	N/A	0
363	3238	AGA	0	1	0.563556	2.00379	0	0.499055	0.499055	0.780491	2.20221
364	3241	AAC	0	0	0.395222	2.60478	0	0	0	N/A	0
365	3244	AGG	1	0	0.600488	2.30771	1.66531	0	-1.66531	1	-7.34861
366	3247	AAT	0	1	0.392999	2.59469	0	0.385402	0.385402	0.868461	1.70068
367	3250	ATA	0	2	0.563736	2.00406	0	0.997972	0.997972	0.609117	4.4038
368	3253	TAT	0	0	0.395222	2	0	0	0	N/A	0
369	3256	TCG	2	0	1	1.62913	2	0	-2	1	-8.8255
370	3259	CAT	0	0	0.395222	2.60478	0	0	0	N/A	0
371	3262	TCA	1	0	1	1.40077	1	0	-1	1	-4.41275
372	3265	TAT	0	2	0.392805	2.00372	0	0.998145	0.998145	0.699053	4.40456
373	3277	GAA	0	1	0.266154	2.37156	0	0.421663	0.421663	0.899097	1.86069
374	3280	TTA	0	0	0.661376	1.73385	0	0	0	N/A	0
375	3283	TGT	0	1	0.40077	2.23747	0	0.446934	0.446934	0.848092	1.97221
376	3286	AGG	0	0	0.610906	2.38909	0	0	0	N/A	0
377	3289	AAC	0	2	0.391092	2.59486	0	0.770753	0.770753	0.755201	3.40114
378	3292	CAA	0	1	0.266154	2.33856	0	0.427613	0.427613	0.897818	1.88695
379	3295	AAG	1	0	0.305544	2.25555	3.27285	0	-3.27285	1	-14.4423
380	3298	AAT	1	0	0.395222	2.60478	2.53023	0	-2.53023	1	-11.1653
381	3301	CTT	0	2	0.98895	2.01105	0	0.994505	0.994505	0.449369	4.3885
382	3304	TTC	0	2	0.397064	2.59875	0	0.769601	0.769601	0.752487	3.39606
383	3307	TTT	0	0	0.395222	2.60478	0	0	0	N/A	0
384	3310	CTT	0	1	0.983037	2.01696	0	0.495795	0.495795	0.672321	2.18782
385	3313	TTT	0	0	0.395222	2.60478	0	0	0	N/A	0
386	3316	GAA	0	1	0.266154	2.39128	0	0.418187	0.418187	0.899845	1.84535
387	3319	AAA	1	3	0.364035	2.47194	2.74699	1.21362	-1.53336	0.917243	-6.76635
388	3322	ACG	0	2	0.990732	2.00927	0	0.995388	0.995388	0.448573	4.3924
389	3328	ATG	0	1	0.0104417	2.98956	0	0.334498	0.334498	0.996519	1.47605
390	3340	TTC	1	1	0.399009	2.59239	2.50621	0.385745	-2.12047	0.982208	-9.35709
391	3343	TTT	0	0	0.395222	2.60478	0	0	0	N/A	0
392	3355	GAA	0	0	0.266154	2.39183	0	0	0	N/A	0
393	3358	GTA	0	0	1	2	0	0	0	N/A	0
394	3361	AGG	0	2	0.202843	2.51826	0	0.7942	0.7942	0.856468	3.50461
395	3364	AGA	0	2	0.595292	2.05761	0	0.972001	0.972001	0.601567	4.2892
396	3367	CTA	2	0	1.31255	1.68745	1.52375	0	-1.52375	1	-6.72392
397	3370	TTC	0	0	0.395222	2.60478	0	0	0	N/A	0
398	3373	AAA	0	1	0.266154	2.29523	0	0.435685	0.435685	0.89609	1.92257
399	3376	TTA	0	0	0.661376	1.73385	0	0	0	N/A	0
400	3382	TAT	0	0	0.395222	2	0	0	0	N/A	0
401	3385	TCG	0	0	1	1.63489	0	0	0	N/A	0
402	3388	TGG	0	0	0	2.36807	0	0	0	N/A	0
403	3391	AAA	0	0	0.266154	2.29494	0	0	0	N/A	0
404	3394	AAC	2	6	0.472284	2.51305	4.23474	2.38753	-1.84721	0.880619	-8.15128
405	3397	AAT	0	0	0.395222	2.60478	0	0	0	N/A	0
406	3400	CGC	0	0	1	2	0	0	0	N/A	0
407	3403	AAG	1	3	0.392639	2.59306	2.54687	1.15693	-1.38993	0.913533	-6.13343
408	3406	AAA	0	0	0.266154	2.29494	0	0	0	N/A	0
409	3409	TGC	0	0	0.395222	2.23967	0	0	0	N/A	0
410	3412	AAA	0	0	0.266154	2.29494	0	0	0	N/A	0
411	3415	GAA	0	0	0.266154	2.39183	0	0	0	N/A	0
412	3418	GGA	0	1	0.986507	1.67147	0	0.598274	0.598274	0.628851	2.64004
413	3421	ACA	0	0	1	2	0	0	0	N/A	0
414	3424	TCT	0	0	1	2	0	0	0	N/A	0
415	3427	TTA	1	0	0.710616	1.92154	1.40723	0	-1.40723	1	-6.20975
416	3430	ATC	0	0	0.760334	2.23967	0	0	0	N/A	0
417	3433	CAA	1	0	0.281881	2.3229	3.54759	0	-3.54759	1	-15.6546
418	3436	CAT	0	0	0.395222	2.60478	0	0	0	N/A	0
419	3442	AGG	0	0	0.610906	2.38909	0	0	0	N/A	0
420	3445	ATT	0	0	0.760334	2.23967	0	0	0	N/A	0
421	3451	ACC	0	0	1	2	0	0	0	N/A	0
422	3454	AAG	0	0	0.315963	2.24514	0	0	0	N/A	0
423	3457	ATT	1	0	0.760334	2.23967	1.31521	0	-1.31521	1	-5.8037
424	3460	TCC	0	0	1	2	0	0	0	N/A	0
425	3463	AGA	1	0	0.561237	2.00108	1.78178	0	-1.78178	1	-7.86255
426	3469	ATG	0	0	0	3	0	0	0	N/A	0
427	3472	GGA	1	0	1	1.66285	1	0	-1	1	-4.41275
428	3475	TGG	0	0	0	2.36807	0	0	0	N/A	0
429	3478	GGT	0	0	1	2	0	0	0	N/A	0
430	3481	ATT	0	0	0.760334	2.23967	0	0	0	N/A	0
431	3484	AGT	0	0	0.395222	2.60478	0	0	0	N/A	0
432	3487	AGA	0	0	0.561098	2	0	0	0	N/A	0
433	3490	TCT	0	2	0.972485	2.02751	0	0.986429	0.986429	0.456757	4.35287
434	3493	GAC	0	0	0.395222	2.60478	0	0	0	N/A	0
435	3496	ACA	0	0	1	2	0	0	0	N/A	0
436	3502	TTT	0	0	0.395222	2.60478	0	0	0	N/A	0
437	3505	AAA	0	0	0.266154	2.29494	0	0	0	N/A	0
438	3508	TGC	1	0	0.395222	2.23967	2.53023	0	-2.53023	1	-11.1653
439	3511	GAG	2	2	0.387325	2.58016	5.16362	0.775146	-4.38847	0.991976	-19.3652
440	3514	AAT	0	1	0.397871	2.60213	0	0.384301	0.384301	0.867376	1.69582
441	3517	TTA	0	0	0.661376	1.73385	0	0	0	N/A	0
442	3520	TCC	0	0	1	2	0	0	0	N/A	0
443	3523	TCT	0	0	1	2	0	0	0	N/A	0
444	3526	AAA	1	0	0.266616	2.29448	3.75071	0	-3.75071	1	-16.551
445	3529	AAG	1	0	0.305544	2.25555	3.27285	0	-3.27285	1	-14.4423
446	3532	GGA	0	0	1	1.65798	0	0	0	N/A	0
447	3535	AAT	0	0	0.395222	2.60478	0	0	0	N/A	0
448	3538	ATT	0	0	0.760334	2.23967	0	0	0	N/A	0
449	3541	GAA	0	0	0.266154	2.39183	0	0	0	N/A	0
450	3547	ATA	0	0	0.733846	2.26615	0	0	0	N/A	0
451	3550	GAT	0	0	0.395222	2.60478	0	0	0	N/A	0
452	3553	CGT	0	0	1	2	0	0	0	N/A	0
453	3556	AAA	0	0	0.266154	2.29494	0	0	0	N/A	0
454	3559	TTC	0	0	0.395222	2.60478	0	0	0	N/A	0
455	3565	GAT	0	4	0.395222	2.59116	0	1.54371	1.54371	0.566756	6.812
456	3568	TTT	0	2	0.4375	2.5625	0	0.780488	0.780488	0.729601	3.4441
457	3571	GGT	0	0	1	2	0	0	0	N/A	0
458	3574	ATT	0	1	0.764515	2.23548	0	0.44733	0.44733	0.745162	1.97396
459	3577	CTT	0	1	0.873498	2.1265	0	0.470256	0.470256	0.708834	2.07512
460	3580	TTT	0	0	0.395222	2.60478	0	0	0	N/A	0
461	3583	TCT	0	0	1	2	0	0	0	N/A	0
462	3586	TCA	0	1	0.994092	1.40113	0	0.71371	0.71371	0.584969	3.14942
463	3589	AGG	2	1	0.609283	2.38244	3.28254	0.419738	-2.86281	0.991553	-12.6328
464	3592	GAA	1	0	0.276573	2.38141	3.61569	0	-3.61569	1	-15.9551
465	3595	GAT	0	0	0.395222	2.60478	0	0	0	N/A	0
466	3598	ACT	0	0	1	2	0	0	0	N/A	0
467	3604	AAT	0	0	0.395222	2.60478	0	0	0	N/A	0
468	3607	TGC	0	2	0.569216	2.17071	0	0.921356	0.921356	0.627662	4.06571
469	3610	GAC	1	1	0.406142	2.59386	2.46219	0.385526	-2.07667	0.981672	-9.16381
470	3613	GAG	0	1	0.332541	2.39698	0	0.417192	0.417192	0.878169	1.84096
471	3616	AAT	0	0	0.395222	2.60478	0	0	0	N/A	0
472	3619	GGA	1	2	0.987196	1.68086	1.01297	1.18987	0.176901	0.690597	0.780619
473	3622	ATT	0	0	0.760334	2.23967	0	0	0	N/A	0
474	3625	TCC	0	0	1	2	0	0	0	N/A	0
475	3628	AGA	0	0	0.561098	2	0	0	0	N/A	0
476	3631	ATG	0	1	0.028048	2.97195	0	0.336479	0.336479	0.990651	1.4848
477	3634	ACT	0	0	1	2	0	0	0	N/A	0
478	3637	CCA	0	0	1	2	0	0	0	N/A	0
479	3640	AAA	0	0	0.266154	2.29494	0	0	0	N/A	0
480	3643	CCT	0	0	1	2	0	0	0	N/A	0
481	3646	TCT	0	0	1	2	0	0	0	N/A	0
482	3649	GAT	0	0	0.395222	2.60478	0	0	0	N/A	0
483	3652	ACC	1	2	0.8719	2.1281	1.14692	0.939805	-0.207116	0.795695	-0.91395
484	3655	ATT	0	0	0.760334	2.23967	0	0	0	N/A	0
485	3679	AAA	0	0	0.266154	2.29494	0	0	0	N/A	0
486	3685	TTC	0	0	0.395222	2.60478	0	0	0	N/A	0
487	3688	TTG	1	0	0.700766	1.88399	1.42701	0	-1.42701	1	-6.29704
488	3691	TGC	0	0	0.395222	2.23967	0	0	0	N/A	0
489	3694	TCC	0	1	1	2	0	0.5	0.5	0.666667	2.20637
490	3697	CAA	0	0	0.266154	2.33862	0	0	0	N/A	0
491	3700	GAT	1	2	0.395222	2.60478	2.53023	0.76782	-1.76241	0.952506	-7.77706
492	3703	CCA	0	3	1	1.79269	0	1.67346	1.67346	0.264513	7.38457
493	3706	TTT	0	0	0.395222	2.60478	0	0	0	N/A	0
494	3709	TGG	0	2	0.0302947	2.34678	0	0.852231	0.852231	0.974673	3.76068
495	3712	TTA	0	0	0.661376	1.73385	0	0	0	N/A	0
496	3715	GAA	0	0	0.266154	2.39183	0	0	0	N/A	0
497	3721	TTC	1	1	0.395222	2.6034	2.53023	0.384112	-2.14611	0.982629	-9.47026
498	3724	ACC	0	2	0.994045	2.00595	0	0.997031	0.997031	0.447095	4.39965
499	3727	GAA	0	0	0.266154	2.39183	0	0	0	N/A	0
500	3730	GAA	0	0	0.266154	2.39183	0	0	0	N/A	0
501	3733	ATC	0	0	0.760334	2.23967	0	0	0	N/A	0
502	3736	AAA	0	0	0.266154	2.29494	0	0	0	N/A	0
503	3739	GAT	0	0	0.395222	2.60478	0	0	0	N/A	0
504	3742	TTC	0	0	0.395222	2.60478	0	0	0	N/A	0
505	3745	TGT	0	0	0.395222	2.23967	0	0	0	N/A	0
506	3751	TAC	0	0	0.395222	2	0	0	0	N/A	0
507	3754	ATT	0	0	0.760334	2.23967	0	0	0	N/A	0
508	3757	CGA	0	0	1.36511	1.23967	0	0	0	N/A	0
509	3760	ATA	0	2	0.759143	2.11436	0	0.945915	0.945915	0.54142	4.17408
510	3763	ATT	0	0	0.760334	2.23967	0	0	0	N/A	0
511	3766	AAA	1	0	0.26707	2.29403	3.74434	0	-3.74434	1	-16.5228
512	3769	CGT	0	0	1	2	0	0	0	N/A	0
513	3772	TTC	0	0	0.395222	2.60478	0	0	0	N/A	0
514	3775	ACA	0	0	1	2	0	0	0	N/A	0
515	3778	AGT	0	0	0.395222	2.60478	0	0	0	N/A	0
516	3781	ACT	0	1	0.985238	2.01476	0	0.496337	0.496337	0.671587	2.19021
517	3784	AAA	0	0	0.266154	2.29494	0	0	0	N/A	0
518	3787	CTA	0	0	1.39522	1.60478	0	0	0	N/A	0
519	3790	AAT	0	2	0.395095	2.60448	0	0.767909	0.767909	0.753915	3.38859
520	3793	TTA	1	1	0.605704	1.91602	1.65097	0.521916	-1.12905	0.942307	-4.98224
521	3796	CTG	1.5	1.5	1.01708	1.78159	1.4748	0.841945	-0.63286	0.825891	-2.79265
522	3799	TCA	0	0	1	1.39522	0	0	0	N/A	0
523	3805	CCT	2	0	1	2	2	0	-2	1	-8.8255
524	3808	AGA	0	2	0.502581	2.06659	0	0.967779	0.967779	0.647027	4.27057
525	3811	AAT	0	1	0.52709	2.47291	0	0.404382	0.404382	0.824303	1.78444
526	3814	TCC	2	0	1	2	2	0	-2	1	-8.8255
527	3817	ACA	0	0	1	2	0	0	0	N/A	0
528	3820	GGT	0	0	1	2	0	0	0	N/A	0
529	3823	TCG	1	0	1	1.63071	1	0	-1	1	-4.41275
530	3829	AAA	0	0	0.266154	2.29494	0	0	0	N/A	0
531	3832	ATC	1	2	0.745837	2.23858	1.34078	0.893423	-0.447352	0.843851	-1.97405
532	3835	AAA	0	0	0.266154	2.29494	0	0	0	N/A	0
533	3838	CTA	2	0	1.31255	1.68745	1.52375	0	-1.52375	1	-6.72392
534	3841	TTT	1	1	0.508469	2.35548	1.96669	0.424542	-1.54215	0.968479	-6.80511
535	3844	AAG	0	0	0.315963	2.24514	0	0	0	N/A	0
536	3847	CTA	0	1	1.37667	1.62333	0	0.616018	0.616018	0.54111	2.71833
537	3859	GCA	1	0	1	2	1	0	-1	1	-4.41275
538	3862	AGT	0	0	0.395222	2.60478	0	0	0	N/A	0
539	3865	GAG	1	0	0.314566	2.34342	3.17899	0	-3.17899	1	-14.0281
540	3871	ATA	0	0	0.733846	2.26615	0	0	0	N/A	0
541	3874	TAC	1	1	0.395222	2.1265	2.53023	0.470256	-2.05997	0.975437	-9.09013
542	3877	TCC	0	0	1	2	0	0	0	N/A	0
543	3883	AGG	0	0	0.610906	2.38909	0	0	0	N/A	0
544	3886	AGT	0	0	0.395222	2.60478	0	0	0	N/A	0
545	3889	AGC	0	1	0.395222	2.60478	0	0.38391	0.38391	0.868259	1.6941
546	3892	GGA	0	0	1	1.65798	0	0	0	N/A	0
547	3895	TAT	0	0	0.395222	2	0	0	0	N/A	0
548	3898	AGG	0	0	0.610906	2.38909	0	0	0	N/A	0
549	3901	AAG	0	0	0.315963	2.24514	0	0	0	N/A	0
550	3904	TTT	0	0	0.395222	2.60478	0	0	0	N/A	0
551	3907	TGT	0	0	0.395222	2.23967	0	0	0	N/A	0
552	3913	CGA	0	1	1.36514	1.24002	0	0.806437	0.806437	0.475986	3.55861
553	3916	AAT	0	0	0.395222	2.60478	0	0	0	N/A	0
554	3919	CTA	2	2	1.26959	1.73041	1.57532	1.15579	-0.419522	0.793056	-1.85124
555	3922	TCT	0	0	1	2	0	0	0	N/A	0
556	3925	TTT	0	0	0.395222	2.60478	0	0	0	N/A	0
557	3928	TTC	0	1	0.397153	2.59846	0	0.384844	0.384844	0.867422	1.69822
558	3931	AAT	0	0	0.395222	2.60478	0	0	0	N/A	0
559	3934	CTA	0	1	1.39359	1.60641	0	0.622504	0.622504	0.535472	2.74696
560	3937	AAT	0	0	0.395222	2.60478	0	0	0	N/A	0
561	3940	ATC	0	0	0.760334	2.23967	0	0	0	N/A	0
562	3952	TGT	0	0	0.395222	2.23967	0	0	0	N/A	0
563	3955	AAT	0	0	0.395222	2.60478	0	0	0	N/A	0
564	3958	TCT	0	0	1	2	0	0	0	N/A	0
565	3970	ATT	0	0	0.760334	2.23967	0	0	0	N/A	0
566	3976	ATA	0	4	0.701514	2.19757	0	1.82019	1.82019	0.330163	8.03204
567	3979	CAT	0	0	0.395222	2.60478	0	0	0	N/A	0
568	3982	TTC	0	2	0.435677	2.4724	0	0.808932	0.808932	0.722812	3.56961
569	3988	TGT	0	2	0.312553	2.26212	0	0.884127	0.884127	0.771946	3.90143
570	3991	AAC	0	0	0.395222	2.60478	0	0	0	N/A	0
571	3994	CAA	0	0	0.266154	2.33862	0	0	0	N/A	0
572	3997	AAA	0	0	0.266154	2.29494	0	0	0	N/A	0
573	4000	AGA	1	2	0.569895	2.12979	1.75471	0.939062	-0.815649	0.885128	-3.59925
574	4003	GAG	0	0	0.315963	2.34202	0	0	0	N/A	0
575	4006	GCA	0	0	1	2	0	0	0	N/A	0
576	4009	CTT	0	0	1	2	0	0	0	N/A	0
577	4012	CTT	0	1	0.993278	2.00672	0	0.498325	0.498325	0.668907	2.19898
578	4015	GTG	1	0	1	2	1	0	-1	1	-4.41275
579	4018	TTA	0	0	0.661376	1.73385	0	0	0	N/A	0
580	4024	AAT	1	0	0.395222	2.60478	2.53023	0	-2.53023	1	-11.1653
581	4027	GAT	0	1	0.394495	2.60237	0	0.384265	0.384265	0.868364	1.69567
582	4030	ACA	0	0	1	2	0	0	0	N/A	0
583	4036	TGC	0	0	0.395222	2.23967	0	0	0	N/A	0
584	4039	AAT	0	0	0.395222	2.60478	0	0	0	N/A	0
585	4042	ATG	0	0	0	3	0	0	0	N/A	0
586	4054	GGC	1	0	1	1.99666	1	0	-1	1	-4.41275
587	4057	GTA	0	1	1	2	0	0.5	0.5	0.666667	2.20637
588	4060	TGC	1	2	0.395222	2.23848	2.53023	0.893463	-1.63676	0.939202	-7.22262
589	4492	AGA	0	4	0.51967	2.06485	0	1.93719	1.93719	0.407412	8.54832
590	4495	TTA	1	3	0.561479	2.06074	1.78101	1.45579	-0.32522	0.797138	-1.43511
591	4501	AAA	0	0	0.266154	2.29494	0	0	0	N/A	0
592	4504	AGT	1	0	0.395222	2.60478	2.53023	0	-2.53023	1	-11.1653
593	4507	CAG	0	1	0.315963	2.27502	0	0.439556	0.439556	0.878053	1.93965
594	4519	CAA	0	2	0.266154	2.33789	0	0.855473	0.855473	0.80603	3.77499
595	4522	ATA	0	3	0.724296	2.25144	0	1.33248	1.33248	0.43311	5.8799
596	4525	AAG	0	0	0.315963	2.24514	0	0	0	N/A	0
597	4528	AAT	0	0	0.395222	2.60478	0	0	0	N/A	0
598	4531	ATA	0	0	0.733846	2.26615	0	0	0	N/A	0
599	4534	TAC	0	0	0.395222	2	0	0	0	N/A	0
600	4537	CCC	0	0	1	2	0	0	0	N/A	0
601	4540	GGA	1	0	1	1.65893	1	0	-1	1	-4.41275
602	4543	GAC	0	0	0.395222	2.60478	0	0	0	N/A	0
603	4546	AGA	0	0	0.561098	2	0	0	0	N/A	0
604	4549	GAG	0	0	0.315963	2.34202	0	0	0	N/A	0
605	4552	CCC	0	0	1	2	0	0	0	N/A	0
606	4555	AAT	1	0	0.395222	2.60478	2.53023	0	-2.53023	1	-11.1653
607	4558	CTA	0	0	1.39522	1.60478	0	0	0	N/A	0
608	4561	CAG	0	0	0.315963	2.28882	0	0	0	N/A	0
609	4564	ATC	0	0	0.760334	2.23967	0	0	0	N/A	0
610	4567	TTT	0	0	0.395222	2.60478	0	0	0	N/A	0
611	4570	TTC	1	0	0.395222	2.60478	2.53023	0	-2.53023	1	-11.1653
612	4573	CTT	0	3	0.979331	2.02067	0	1.48466	1.48466	0.305578	6.55142
613	4594	TCC	1	2	0.990645	2	1.00944	1	-0.00944311	0.743517	-0.0416701
614	4615	TTG	0	1	0.709608	1.9271	0	0.518914	0.518914	0.730874	2.28984
615	4627	CTA	1.5	3.5	1.37405	1.62076	1.09166	2.15948	1.06781	0.410048	4.71199
616	4684	AAA	1	2	0.276573	2.28519	3.61569	0.8752	-2.74049	0.96755	-12.0931
617	4687	GGG	0	1	1.07637	1.92363	0	0.519851	0.519851	0.64121	2.29397
618	4690	GTA	1	0	1	2	1	0	-1	1	-4.41275
619	4693	AAA	0	0	0.266154	2.29494	0	0	0	N/A	0
620	4696	ATC	0	0	0.760334	2.23967	0	0	0	N/A	0
621	4699	TTT	0	0	0.395222	2.60478	0	0	0	N/A	0
622	4702	TAT	0	0	0.395222	2	0	0	0	N/A	0
623	4705	TTT	0	0	0.395222	2.60478	0	0	0	N/A	0
624	4711	CAA	0	0	0.266154	2.33862	0	0	0	N/A	0
625	4714	CCC	0	0	1	2	0	0	0	N/A	0
626	4717	AAT	0	0	0.395222	2.60478	0	0	0	N/A	0
627	4720	CAC	0	0	0.395222	2.60478	0	0	0	N/A	0
628	4723	TCT	0	0	1	2	0	0	0	N/A	0
629	4726	TTT	0	0	0.395222	2.60478	0	0	0	N/A	0
630	4732	CTT	0	5	0.984793	2.01521	0	2.48113	2.48113	0.13677	10.9486
631	4735	TGG	1	1	0.0130355	2.36105	76.7134	0.423541	-76.2899	0.99997	-336.648
632	4771	AAA	0	2	0.266154	2.29941	0	0.869788	0.869788	0.80328	3.83816
633	4774	AGA	0	4	0.497368	2.06719	0	1.935	1.935	0.422154	8.53866
634	4798	CAC	0	1	0.39396	2.60218	0	0.384294	0.384294	0.868511	1.69579
635	5038	TTA	0	0	0.661376	1.73385	0	0	0	N/A	0
636	5041	TTC	0	1	0.399009	2.59239	0	0.385745	0.385745	0.866615	1.7022
637	5044	ACT	0	0	1	2	0	0	0	N/A	0
638	5047	AGA	0	0	0.561098	2	0	0	0	N/A	0
639	5065	ATA	0	2	0.724684	2.25204	0	0.888084	0.888084	0.572367	3.91889
640	5086	AAT	0	0	0.395222	2.60478	0	0	0	N/A	0
641	5089	TGT	0	2	0.395222	2.2565	0	0.886329	0.886329	0.724127	3.91115
642	5095	AAA	0	1	0.266154	2.29511	0	0.43571	0.43571	0.896085	1.92268
643	5098	AAG	0	1	0.316538	2.24775	0	0.44489	0.44489	0.876559	1.96319
644	5317	AAG	0	0	0.315963	2.24514	0	0	0	N/A	0
645	5320	CCG	0	0	1	2	0	0	0	N/A	0
646	5323	AGT	0	0	0.395222	2.60478	0	0	0	N/A	0
647	5326	ACT	0	0	1	2	0	0	0	N/A	0
648	5329	CTA	0	0	1.39522	1.60478	0	0	0	N/A	0
649	5332	CCG	1	0	1	2	1	0	-1	1	-4.41275
650	5335	TTG	0	0	0.711184	1.9237	0	0	0	N/A	0
651	5338	AGT	0	0	0.395222	2.60478	0	0	0	N/A	0
652	5344	CAA	0	0	0.266154	2.33862	0	0	0	N/A	0
653	5347	CCC	0	0	1	2	0	0	0	N/A	0
654	5356	ATA	0	2	0.650931	2.25726	0	0.886028	0.886028	0.602446	3.90982
655	5362	GGT	1	1	0.809042	2.19096	1.23603	0.456421	-0.779608	0.927272	-3.44021
656	5365	GTA	0	1	1.00287	1.99713	0	0.500718	0.500718	0.665711	2.20954
657	5368	GAT	0	0	0.395222	2.60478	0	0	0	N/A	0
658	5371	ATG	0	1	0.00580933	2.98612	0	0.334883	0.334883	0.998058	1.47775
659	5374	ATC	0	0	0.760334	2.23967	0	0	0	N/A	0
660	5599	AAA	0	0	0.266154	2.29494	0	0	0	N/A	0
661	5602	CTC	1	2	1.00005	1.99995	0.999946	1.00003	8.04525e-05	0.740717	0.000355017
662	5605	ATC	1	1	0.683963	2.31604	1.46207	0.431772	-1.03029	0.948022	-4.54643
663	5608	CAT	0	1	0.395222	2.47828	0	0.403506	0.403506	0.86246	1.78057
664	5611	TTT	0	0	0.395222	2.60478	0	0	0	N/A	0
665	5632	AGT	1	1	0.395222	2.60478	2.53023	0.38391	-2.14632	0.982644	-9.47116
666	5638	GGA	0	1	0.846501	1.81148	0	0.552035	0.552035	0.681525	2.43599
667	5641	AAG	0	0	0.315963	2.24514	0	0	0	N/A	0
668	5644	ATC	1	2	0.676873	2.32313	1.47738	0.860909	-0.616472	0.870252	-2.72034
669	5653	GGG	0	1	0.994207	2.00213	0	0.499468	0.499468	0.668193	2.20403
670	5656	AAT	0	1	0.395222	2.60478	0	0.38391	0.38391	0.868259	1.6941
671	5659	GGG	0	1	0.980814	2.00959	0	0.497613	0.497613	0.672013	2.19584
672	5662	GAT	0	1	0.395222	2.60478	0	0.38391	0.38391	0.868259	1.6941
673	5665	AAA	1	0	0.267551	2.29355	3.7376	0	-3.7376	1	-16.4931
674	5668	AAG	0	2	0.324303	2.24948	0	0.889094	0.889094	0.763872	3.92335
675	5680	TCT	0	1	0.983037	2	0	0.5	0.5	0.670458	2.20637
676	5683	ATT	0	0	0.760334	2.23967	0	0	0	N/A	0
677	5686	TAT	0	1	0.521723	2	0	0.5	0.5	0.793108	2.20637
678	5689	ATA	0	1	0.794485	2.20552	0	0.453409	0.453409	0.735172	2.00078
679	5692	CGA	0	0	1.36511	1.23967	0	0	0	N/A	0
680	5698	AAT	0	0	0.395222	2.60478	0	0	0	N/A	0
681	5710	TTT	0	0	0.395222	2.60478	0	0	0	N/A	0
682	5713	GTT	0	2	1	2	0	1	1	0.444444	4.41275
683	5719	GAC	0	0	0.395222	2.60478	0	0	0	N/A	0
684	5722	GCC	1	4	0.991491	2.00851	1.00858	1.99153	0.982945	0.46652	4.33749
685	5725	ATT	0	0	0.760334	2.23967	0	0	0	N/A	0
686	5728	GTC	0	0	1	2	0	0	0	N/A	0
687	5749	ATG	0	1	0.00532592	2.99467	0	0.333926	0.333926	0.998225	1.47353
688	5752	GAC	0	1	0.395222	2.47828	0	0.403506	0.403506	0.86246	1.78057
689	5755	TTT	0	1	0.440814	2.55919	0	0.390749	0.390749	0.853062	1.72428
690	5773	ACA	0	2	0.986604	2.00214	0	0.998931	0.998931	0.448757	4.40803
691	5776	AAT	0	1	0.395533	2.60447	0	0.383956	0.383956	0.868156	1.6943
692	5779	TTC	0	0	0.395222	2.60478	0	0	0	N/A	0
693	5791	AAA	0	1	0.266154	2.29766	0	0.435225	0.435225	0.896188	1.92054
694	5794	TTA	0	7	0.567535	2.04092	0	3.42983	3.42983	0.179514	15.135
695	5830	AGA	0	0	0.561098	2	0	0	0	N/A	0
696	5833	ATA	0	3	0.672636	2.17185	0	1.38131	1.38131	0.445121	6.09538
697	5836	AAT	0	1	0.39866	2.60134	0	0.384417	0.384417	0.867113	1.69634
698	5848	AGA	0	6	0.608348	2.07031	0	2.89812	2.89812	0.213161	12.7887
699	5851	ACT	0	1	0.873498	2.1265	0	0.470256	0.470256	0.708834	2.07512
700	5854	TTG	0	0	0.711184	1.9237	0	0	0	N/A	0
701	5857	AGC	1	0	0.395222	2.60478	2.53023	0	-2.53023	1	-11.1653
702	5863	AAA	0	0	0.266154	2.29494	0	0	0	N/A	0
703	5953	CAA	1.5	2.5	0.267871	2.33762	5.5997	1.06947	-4.53023	0.970463	-19.9908
704	5956	GAA	0.5	3.5	0.267402	2.38787	1.86985	1.46574	-0.404106	0.800528	-1.78322
705	5968	CCC	0	0	1	2	0	0	0	N/A	0
706	5971	CCC	0	0	1	2	0	0	0	N/A	0
707	5986	GGG	0	0	1	2	0	0	0	N/A	0
708	5989	GGG	1	0	1	1.99041	1	0	-1	1	-4.41275
709	5992	TTC	0	1	0.400115	2.58877	0	0.386285	0.386285	0.866132	1.70458
710	5995	GAC	0	1	0.395222	2.60478	0	0.38391	0.38391	0.868259	1.6941
711	5998	AAA	0	1	0.268527	2.30064	0	0.434662	0.434662	0.895481	1.91805
712	6001	AAG	0	0	0.315963	2.24514	0	0	0	N/A	0
713	6004	AAG	1	0	0.315221	2.24588	3.17238	0	-3.17238	1	-13.9989
714	6094	AGA	1.5	1.5	0.651963	2.00948	2.30074	0.746463	-1.55428	0.917337	-6.85866
715	6097	AGA	0.5	6.5	0.601017	2.07395	0.831924	3.13411	2.30219	0.339218	10.159
716	6103	TTT	0	0	0.395222	2.60478	0	0	0	N/A	0
717	6115	ATA	0	0	0.733846	2.26615	0	0	0	N/A	0
718	6118	AAG	0	1	0.316484	2.2475	0	0.444939	0.444939	0.876566	1.9634
719	6121	AAT	0	0	0.395222	2.60478	0	0	0	N/A	0
720	6124	TAC	0	0	0.395222	2	0	0	0	N/A	0
721	6127	ACA	1	1	0.995105	2.00197	1.00492	0.499509	-0.505411	0.889759	-2.23025
722	6130	AAG	1	0	0.315047	2.24605	3.17413	0	-3.17413	1	-14.0066
723	6145	TTA	0	0	0.661376	1.73385	0	0	0	N/A	0
724	6148	CCC	0	2	1	2	0	1	1	0.444444	4.41275
725	6151	TAT	1	2	0.395222	2.00607	2.53023	0.996976	-1.53325	0.92765	-6.76585
726	6154	CCT	0	1	1	2	0	0.5	0.5	0.666667	2.20637
727	6193	TTT	0	1	0.404899	2.5951	0	0.385341	0.385341	0.865034	1.70042
728	6196	TTA	1	2	0.66874	1.78355	1.49535	1.12136	-0.373992	0.817463	-1.65033
729	6202	AAA	0	0	0.266154	2.29494	0	0	0	N/A	0
730	6205	GAA	0	0	0.266154	2.39183	0	0	0	N/A	0
731	6208	ACT	0	1	0.98908	2.01092	0	0.497285	0.497285	0.670307	2.19439
732	6211	CGA	1	1	1.35163	1.25952	0.739848	0.79395	0.0541019	0.732052	0.238738
733	6235	CTT	0	1	0.995818	2.00418	0	0.498957	0.498957	0.668061	2.20177
734	6241	AGA	0	1	0.555952	2.00515	0	0.498717	0.498717	0.782924	2.20071
735	6244	ATT	0	0	0.760334	2.23967	0	0	0	N/A	0
736	6247	CTG	0	1	1.39468	1.60532	0	0.622928	0.622928	0.535107	2.74883
737	6250	CCT	0	1	1	2	0	0.5	0.5	0.666667	2.20637
738	6253	TCC	0	0	1	2	0	0	0	N/A	0
739	6256	TTA	0	0	0.661376	1.73385	0	0	0	N/A	0
740	6259	AAA	0	0	0.266154	2.29494	0	0	0	N/A	0
741	6262	TAT	0	0	0.395222	2	0	0	0	N/A	0
742	6265	CAT	0	0	0.395222	2.60478	0	0	0	N/A	0
743	6268	AAA	0	1	0.266154	2.31521	0	0.431926	0.431926	0.896894	1.90598
744	6271	CAG	0	0	0.315963	2.28882	0	0	0	N/A	0
745	6274	TTC	0	0	0.395222	2.60478	0	0	0	N/A	0
746	6277	CTG	0	0	1.39522	1.60478	0	0	0	N/A	0
747	6283	GTT	0	0	1	2	0	0	0	N/A	0
748	6286	GAG	0	0	0.315963	2.34202	0	0	0	N/A	0
749	6289	CAC	0	2	0.527271	2.47273	0	0.808823	0.808823	0.679376	3.56913
750	6292	CTT	0	1	1	2	0	0.5	0.5	0.666667	2.20637
751	6295	TTT	0	0	0.395222	2.60478	0	0	0	N/A	0
752	6298	CAA	0	1	0.266154	2.33784	0	0.427746	0.427746	0.89779	1.88754
753	6301	GGA	1	0	1	1.66416	1	0	-1	1	-4.41275
754	6304	AAT	0	0	0.395222	2.60478	0	0	0	N/A	0
755	6307	CTA	0	3	0.890449	2.10955	0	1.4221	1.4221	0.347701	6.27539
756	6310	AAA	0	0	0.266154	2.29494	0	0	0	N/A	0
757	6316	CAG	0	1	0.317394	2.29452	0	0.435821	0.435821	0.878482	1.92317
758	6319	GAA	0	0	0.266154	2.39183	0	0	0	N/A	0
759	6322	CAT	0	0	0.395222	2.60478	0	0	0	N/A	0
760	6325	TTG	2	0	0.70961	1.9177	2.81845	0	-2.81845	1	-12.4371
761	6328	AAT	0	0	0.395222	2.60478	0	0	0	N/A	0
762	6331	AAG	0	0	0.315963	2.24514	0	0	0	N/A	0
763	6334	TTT	0	0	0.395222	2.60478	0	0	0	N/A	0
764	6337	GAT	0	1	0.395222	2.47828	0	0.403506	0.403506	0.86246	1.78057
765	6340	TCT	0	1	0.873498	2	0	0.5	0.5	0.696016	2.20637
766	6343	TTA	0	0	0.661376	1.73385	0	0	0	N/A	0
767	6346	TCG	0	0	1	1.63489	0	0	0	N/A	0
768	6349	GAT	0	0	0.395222	2.60478	0	0	0	N/A	0
769	6352	CAT	0	0	0.395222	2.60478	0	0	0	N/A	0
770	6355	AAA	0	0	0.266154	2.29494	0	0	0	N/A	0
771	6358	AAC	0	1	0.40077	2.59923	0	0.384729	0.384729	0.86641	1.69771
772	6361	CCA	0	1	1.00562	1.99438	0	0.50141	0.50141	0.664792	2.2126
773	6364	CTT	1	1	1	2	1	0.5	-0.5	0.888889	-2.20637
774	6367	TTC	3	0	0.395222	2.60478	7.59068	0	-7.59068	1	-33.4958
775	6370	GAA	0	0	0.266154	2.39183	0	0	0	N/A	0
776	6373	GAT	0	0	0.395222	2.60478	0	0	0	N/A	0
777	6376	CTC	1	0	1.01109	1.98891	0.989036	0	-0.989036	1	-4.36437
778	6379	TTC	0	0	0.395222	2.60478	0	0	0	N/A	0
779	6382	CTT	0	1	1	2	0	0.5	0.5	0.666667	2.20637
780	6385	CTC	0	0	1	2	0	0	0	N/A	0
781	6388	TTC	0	0	0.395222	2.60478	0	0	0	N/A	0
782	6391	GGG	0	0	1	2	0	0	0	N/A	0
783	6394	ATC	1	0	0.760334	2.23967	1.31521	0	-1.31521	1	-5.8037
784	6397	GAA	0	0	0.266154	2.39183	0	0	0	N/A	0
785	6400	CAT	0	0	0.395222	2.60478	0	0	0	N/A	0
786	6403	CAA	0	1	0.26855	2.33623	0	0.42804	0.42804	0.896901	1.88883
787	6406	TTG	0	0	0.711184	1.9237	0	0	0	N/A	0
788	6409	CAA	0	0	0.266154	2.33862	0	0	0	N/A	0
789	6412	CGA	0	0	1.36511	1.23967	0	0	0	N/A	0
790	6415	TTC	0	0	0.395222	2.60478	0	0	0	N/A	0
791	6418	GAT	0	0	0.395222	2.60478	0	0	0	N/A	0
792	6421	AGA	0	0	0.561098	2	0	0	0	N/A	0
793	6427	CTC	0	0	1	2	0	0	0	N/A	0
794	6430	GTT	0	1	0.761144	2.23886	0	0.446657	0.446657	0.746285	1.97098
795	6433	GGG	0	0	1	2	0	0	0	N/A	0
796	6436	ATA	0	0	0.733846	2.26615	0	0	0	N/A	0
797	6439	GAT	0	0	0.395222	2.60478	0	0	0	N/A	0
798	6451	AAA	0	3	0.333311	2.31959	0	1.29333	1.29333	0.668453	5.70715
799	6460	CCC	0	0	1	2	0	0	0	N/A	0
800	6463	CTA	2	1	1.3655	1.61302	1.46466	0.619954	-0.844707	0.903645	-3.72748
801	6466	GAA	0	0	0.266154	2.39183	0	0	0	N/A	0
802	6469	ACG	0	0	1	2	0	0	0	N/A	0
803	6472	TAT	0	0	0.395222	2	0	0	0	N/A	0
804	6475	AGG	0	2	0.593262	2.40267	0	0.832407	0.832407	0.643168	3.6732
805	6478	AGG	0	0	0.610906	2.38909	0	0	0	N/A	0
806	6481	TTT	0	0	0.395222	2.60478	0	0	0	N/A	0
807	6484	TCT	0	1	0.983037	2.01696	0	0.495795	0.495795	0.672321	2.18782
808	6487	CCT	0	0	1	2	0	0	0	N/A	0
809	6490	CAT	0	0	0.395222	2.60478	0	0	0	N/A	0
810	6493	ACG	0	0	1	2	0	0	0	N/A	0
811	6496	GCT	0	0	1	2	0	0	0	N/A	0
812	6499	CAA	0	0	0.266154	2.33862	0	0	0	N/A	0
813	6502	GAA	0	0	0.266154	2.39183	0	0	0	N/A	0
814	6505	AAA	0	0	0.266154	2.29494	0	0	0	N/A	0
815	6508	ATG	0	0	0	3	0	0	0	N/A	0
816	6511	ATT	0	0	0.760334	2.23967	0	0	0	N/A	0
817	6514	CTA	0	2	1.39449	1.59595	0	1.25317	1.25317	0.284818	5.52993
818	6517	ATT	0	0	0.760334	2.23967	0	0	0	N/A	0
819	6529	TTT	1.16667	2.83333	0.813893	2.17451	1.43344	1.30298	-0.130464	0.739331	-0.575703
820	6532	ATT	0	0	0.760334	2.23967	0	0	0	N/A	0
821	6535	CCT	0	6	1	2	0	3	3	0.0877915	13.2382
822	6559	AGA	0	1	0.46797	2.09313	0	0.477754	0.477754	0.817278	2.10821
823	6565	AAA	0	5	0.266154	2.31688	0	2.15807	2.15807	0.580587	9.52303
824	6571	AAA	1	0	0.276573	2.28453	3.61569	0	-3.61569	1	-15.9551
825	6577	ATC	0	1	0.762555	2.23744	0	0.446938	0.446938	0.745815	1.97223
826	6580	CAT	0	0	0.395222	2.60478	0	0	0	N/A	0
827	6583	AAA	0	0	0.266154	2.29494	0	0	0	N/A	0
828	6586	GAA	0	0	0.266154	2.39183	0	0	0	N/A	0
829	6589	TTA	0	0	0.661376	1.73385	0	0	0	N/A	0
830	6592	GAC	0	0	0.395222	2.60478	0	0	0	N/A	0
831	6598	AAT	0	1	0.394025	2.60191	0	0.384333	0.384333	0.86848	1.69597
832	6601	TTG	0	0	0.711184	1.9237	0	0	0	N/A	0
833	6604	AGC	0	0	0.395222	2.60478	0	0	0	N/A	0
834	6610	TTT	0	0	0.395222	2.60478	0	0	0	N/A	0
835	6613	TTC	0	1	0.461312	2.46232	0	0.406121	0.406121	0.842213	1.79211
836	6616	CTT	0	0	1	2	0	0	0	N/A	0
837	6619	CTT	0	0	1	2	0	0	0	N/A	0
838	6622	TAC	0	0	0.395222	2	0	0	0	N/A	0
839	6625	AGA	0	0	0.561098	2	0	0	0	N/A	0
840	6637	AAA	0	0	0.266154	2.29494	0	0	0	N/A	0
841	6649	AAA	0	2	0.305476	2.38628	0	0.838125	0.838125	0.785907	3.69844
842	6652	TTC	0	1	0.471592	2.52841	0	0.395506	0.395506	0.842803	1.74527
843	6655	ATT	0	0	0.760334	2.23967	0	0	0	N/A	0
844	6658	CGT	0	1	0.98888	2.00441	0	0.498901	0.498901	0.669634	2.20152
845	6661	ACT	0	0	1	2	0	0	0	N/A	0
846	6664	CCT	0	0	1	2	0	0	0	N/A	0
847	6667	AAC	0	0	0.395222	2.60478	0	0	0	N/A	0
848	6670	TCA	0	0	1	1.39522	0	0	0	N/A	0
849	6673	AGT	0	0	0.395222	2.60478	0	0	0	N/A	0
850	6682	GTT	0	0	1	2	0	0	0	N/A	0
851	6685	TTG	0	1	0.645094	2.06616	0	0.483989	0.483989	0.762068	2.13572
852	6688	AAA	0	0	0.266154	2.29494	0	0	0	N/A	0
853	6691	GAG	0	0	0.315963	2.34202	0	0	0	N/A	0
854	6694	TTT	1	0	0.395222	2.60478	2.53023	0	-2.53023	1	-11.1653
855	6700	AGG	1	0	0.610007	2.38207	1.63933	0	-1.63933	1	-7.23394
856	6703	AAA	0	0	0.266154	2.29494	0	0	0	N/A	0
857	6706	TCC	1	2	0.995273	2.00473	1.00475	0.997642	-0.00710759	0.742839	-0.031364
858	6709	TTA	0	0	0.661376	1.73385	0	0	0	N/A	0
859	6718	CTT	0	3	0.871208	2.12879	0	1.40925	1.40925	0.357302	6.21867
860	6721	GAG	0	0	0.315963	2.34202	0	0	0	N/A	0
861	6724	CTG	0	0	1.39522	1.60478	0	0	0	N/A	0
862	6727	TCT	0	0	1	2	0	0	0	N/A	0
863	6730	CTA	0	0	1.39522	1.60478	0	0	0	N/A	0
864	6733	ACC	0	0	1	2	0	0	0	N/A	0
865	6739	TTT	0	0	0.395222	2.60478	0	0	0	N/A	0
866	6742	TTT	0	0	0.395222	2.60478	0	0	0	N/A	0
867	6745	GTC	0	0	1	2	0	0	0	N/A	0
868	6748	TCC	1	1	0.873498	2	1.14482	0.5	-0.644822	0.907594	-2.84544
869	6751	TTT	0	0	0.395222	2.60478	0	0	0	N/A	0
870	6757	ATC	1	1	0.762634	2.23737	1.31125	0.446954	-0.864292	0.935377	-3.8139
871	6769	TTT	0	1	0.395222	2.59917	0	0.384738	0.384738	0.868013	1.69775
872	6775	TCA	0	0	1	1.39522	0	0	0	N/A	0
873	6778	TTC	0	1	0.397688	2.59671	0	0.385103	0.385103	0.867189	1.69936
874	6784	TCC	1	1	0.991395	1.99868	1.00868	0.50033	-0.50835	0.890067	-2.24322
875	6787	AAT	0	0	0.395222	2.60478	0	0	0	N/A	0
876	6790	TGT	0	0	0.395222	2.23967	0	0	0	N/A	0
877	6796	GAC	0	0	0.395222	2.60478	0	0	0	N/A	0
878	6805	AAA	0	0	0.266154	2.29494	0	0	0	N/A	0
879	6808	AGA	0	2	0.723629	2.25041	0	0.888725	0.888725	0.572572	3.92172
880	6811	GTG	1	0	1	2	1	0	-1	1	-4.41275
881	6814	TTT	0	0	0.395222	2.60478	0	0	0	N/A	0
882	6817	CCT	0	1	1	2	0	0.5	0.5	0.666667	2.20637
883	6820	TGT	0	0	0.395222	2.23967	0	0	0	N/A	0
884	6823	TCC	0	1	0.998579	2.00142	0	0.499645	0.499645	0.66714	2.20481
885	6826	GGA	0	0	1	1.65798	0	0	0	N/A	0
886	6829	ATT	0	0	0.760334	2.23967	0	0	0	N/A	0
887	6832	TGT	0	1	0.521723	2.18954	0	0.456718	0.456718	0.807572	2.01538
888	6835	TGT	0	0	0.395222	2.23967	0	0	0	N/A	0
889	6838	CTT	0	0	1	2	0	0	0	N/A	0
890	6841	TGC	0	0	0.395222	2.23967	0	0	0	N/A	0
891	6844	TTT	0	0	0.395222	2.60478	0	0	0	N/A	0
892	6847	GCG	1	2	1	1.9948	1	1.0026	0.00260431	0.739969	0.0114922
893	6850	CTT	0	1	1	2	0	0.5	0.5	0.666667	2.20637
894	6865	AAT	0	0	0.395222	2.60478	0	0	0	N/A	0
895	6868	CAT	0	0	0.395222	2.60478	0	0	0	N/A	0
896	6874	GTT	0	0	1	2	0	0	0	N/A	0
897	6880	ACA	0	0	1	2	0	0	0	N/A	0
898	6883	TTA	0	0	0.661376	1.73385	0	0	0	N/A	0
899	6886	CTT	0	0	1	2	0	0	0	N/A	0
900	6889	CGG	1	0	1.36511	1.55222	0.73254	0	-0.73254	1	-3.23252
901	6895	TCC	0	0	1	2	0	0	0	N/A	0
902	6898	TTA	0	0	0.661376	1.73385	0	0	0	N/A	0
903	6901	CTC	0	1	0.989448	2.01055	0	0.497376	0.497376	0.670184	2.1948
904	6904	CTT	0	0	1	2	0	0	0	N/A	0
905	6910	CAA	0	1	0.266154	2.33955	0	0.427432	0.427432	0.897857	1.88615
906	6913	AAA	0	0	0.266154	2.29494	0	0	0	N/A	0
907	6916	GGC	0	1	0.983037	2.01696	0	0.495795	0.495795	0.672321	2.18782
908	6919	AGC	0	0	0.395222	2.60478	0	0	0	N/A	0
909	6922	AAC	0	0	0.395222	2.60478	0	0	0	N/A	0
910	6925	ATA	0	0	0.733846	2.26615	0	0	0	N/A	0
911	6937	TTT	0	0	0.395222	2.60478	0	0	0	N/A	0
912	6940	TGT	0	1	0.391596	2.24084	0	0.44626	0.44626	0.851242	1.96924
913	6943	TTT	0	1	0.406341	2.59366	0	0.385556	0.385556	0.864553	1.70136
914	6946	TTC	0	1	0.402687	2.58035	0	0.387544	0.387544	0.865008	1.71014
915	6961	AAA	0	1	0.266154	2.29781	0	0.435197	0.435197	0.896194	1.92042
916	6964	AAT	0	5	0.385327	2.56469	0	1.94955	1.94955	0.496652	8.60289
917	6967	AAT	0	2	0.395222	2.60478	0	0.76782	0.76782	0.753875	3.3882
918	6970	ACG	0	0	1	2	0	0	0	N/A	0
919	6973	AAG	0	2	0.348338	2.49166	0	0.802678	0.802678	0.769735	3.54202
920	6976	GAT	1	0	0.395222	2.60478	2.53023	0	-2.53023	1	-11.1653
921	6982	TTC	0	0	0.395222	2.60478	0	0	0	N/A	0
922	6985	CTT	0	0	1	2	0	0	0	N/A	0
923	6988	TGT	0	0	0.395222	2.23967	0	0	0	N/A	0
924	6991	GAT	0	2	0.395222	2.58343	0	0.774166	0.774166	0.752235	3.4162
925	6994	ACA	0	0	1	2	0	0	0	N/A	0
926	6997	CTC	1	1	0.873498	2.1265	1.14482	0.470256	-0.674566	0.915222	-2.97669
927	7000	TTG	0	1	0.694609	1.95943	0	0.510352	0.510352	0.738283	2.25206
928	7003	ATC	1	0	0.760334	2.23967	1.31521	0	-1.31521	1	-5.8037
929	7006	GAA	0	2	0.266154	2.38664	0	0.837998	0.837998	0.809407	3.69788
930	7030	ATT	1	0	0.760334	2.23967	1.31521	0	-1.31521	1	-5.8037
931	7060	TTG	0	1	0.716399	1.91849	0	0.521244	0.521244	0.72811	2.30012
932	7063	TTC	0	1	0.402687	2.58035	0	0.387544	0.387544	0.865008	1.71014
933	7066	AAA	0	2	0.26682	2.29654	0	0.870874	0.870874	0.802655	3.84295
934	7069	TTT	0	2	0.39818	2.5984	0	0.769704	0.769704	0.7519	3.39651
935	7072	GAA	0	1	0.268987	2.38899	0	0.418586	0.418586	0.8988	1.84712
936	7075	CCT	0	1	1	2	0	0.5	0.5	0.666667	2.20637
937	7078	CTC	0	2	0.949869	2.05013	0	0.975547	0.975547	0.467004	4.30485
938	7081	CGT	0	3	0.98888	2.01112	0	1.49171	1.49171	0.301266	6.58253
939	7090	ATA	0	1	0.742555	2.25744	0	0.442979	0.442979	0.752482	1.95475
940	7093	TTT	1	1	0.395222	2.52841	2.53023	0.395506	-2.13472	0.981726	-9.41999
941	7096	CTA	0.5	1.5	1.38076	1.61144	0.36212	0.930845	0.568726	0.538547	2.50964
942	7174	ATG	0	0	0	3	0	0	0	N/A	0
943	7177	ATC	1	1	0.715837	2.19236	1.39697	0.45613	-0.940837	0.939413	-4.15168
944	7180	TAT	0	0	0.395222	2	0	0	0	N/A	0
945	7183	TTA	0	0	0.661376	1.73385	0	0	0	N/A	0
946	7186	CAA	0	0	0.266154	2.33862	0	0	0	N/A	0
947	7189	AGT	0	0	0.395222	2.60478	0	0	0	N/A	0
948	7192	TGG	0	0	0	2.36807	0	0	0	N/A	0
949	7195	TCT	0	1	0.996562	2	0	0.5	0.5	0.667432	2.20637
950	7198	AAC	0	0	0.395222	2.60478	0	0	0	N/A	0
951	7201	TTA	0	0	0.661376	1.73385	0	0	0	N/A	0
952	7204	TTG	0	1	0.709354	1.92765	0	0.518767	0.518767	0.731	2.28919
953	7207	ATT	0	0	0.760334	2.23967	0	0	0	N/A	0
954	7210	GTC	0	0	1	2	0	0	0	N/A	0
955	7213	ACT	0	1	1	2	0	0.5	0.5	0.666667	2.20637
956	7216	AAC	0	0	0.395222	2.60478	0	0	0	N/A	0
957	7219	CCT	0	1	0.991395	2.00861	0	0.497858	0.497858	0.669535	2.19692
958	7222	AGA	0	0	0.561098	2	0	0	0	N/A	0
959	7225	TTA	0	1	0.656732	1.74904	0	0.571742	0.571742	0.727018	2.52295
960	7228	TTC	0	1	0.401592	2.59841	0	0.384851	0.384851	0.866136	1.69825
961	7234	CGA	0	0	1.36511	1.23967	0	0	0	N/A	0
962	7243	ATG	0	1	0.00229312	2.99452	0	0.333943	0.333943	0.999235	1.47361
963	7246	AAT	0	0	0.395222	2.60478	0	0	0	N/A	0
964	7255	TTT	0	1	0.521723	2.47828	0	0.403506	0.403506	0.826092	1.78057
965	7258	TTG	0	1	0.694609	1.95943	0	0.510352	0.510352	0.738283	2.25206
966	7261	CTC	0	0	1	2	0	0	0	N/A	0
967	7264	GAG	0	0	0.315963	2.34202	0	0	0	N/A	0
968	7267	CTC	0	0	1	2	0	0	0	N/A	0
969	7270	CAT	0	0	0.395222	2.60478	0	0	0	N/A	0
970	7273	CAT	0	0	0.395222	2.60478	0	0	0	N/A	0
971	7276	ATG	0	0	0	3	0	0	0	N/A	0
972	7279	CTA	0	0	1.39522	1.60478	0	0	0	N/A	0
973	7318	CCC	0	1	0.996497	2.0035	0	0.499126	0.499126	0.667834	2.20252
974	7321	AAG	0	1	0.316168	2.24607	0	0.445222	0.445222	0.876605	1.96465
975	7324	ACA	0	0	1	2	0	0	0	N/A	0
976	7327	AAT	1	0	0.395222	2.60478	2.53023	0	-2.53023	1	-11.1653
977	7333	ATT	0	0	0.760334	2.23967	0	0	0	N/A	0
978	7336	AGG	1	1	0.621924	2.37489	1.60791	0.421072	-1.18684	0.956932	-5.23723
979	7339	TTC	1	0	0.395222	2.60478	2.53023	0	-2.53023	1	-11.1653
980	7348	GCA	0	1	1	2	0	0.5	0.5	0.666667	2.20637
981	7351	GAA	0	0	0.266154	2.39183	0	0	0	N/A	0
982	7354	CAA	0	0	0.266154	2.33862	0	0	0	N/A	0
983	7357	ACT	0	1	0.999615	2.00038	0	0.499904	0.499904	0.666795	2.20595
984	7360	ATG	0	0	0	3	0	0	0	N/A	0
985	7363	TCG	0	0	1	1.63489	0	0	0	N/A	0
986	7366	AGA	0	0	0.561098	2	0	0	0	N/A	0
987	7369	CAA	0	0	0.266154	2.33862	0	0	0	N/A	0
988	7372	GAG	0	0	0.315963	2.34202	0	0	0	N/A	0
989	7375	CAT	0	0	0.395222	2.60478	0	0	0	N/A	0
990	7378	CTT	0	1	0.989448	2.01055	0	0.497376	0.497376	0.670184	2.1948
991	7381	CAT	0	0	0.395222	2.60478	0	0	0	N/A	0
992	7387	GTA	0	2	0.986749	2.00708	0	0.996475	0.996475	0.449443	4.39719
993	7393	AAA	0	0	0.266154	2.29494	0	0	0	N/A	0
994	7396	ATG	0	1	0.091686	2.90831	0	0.343842	0.343842	0.969438	1.51729
995	7399	GTG	0	0	1	2	0	0	0	N/A	0
996	7402	GAT	0	0	0.395222	2.60478	0	0	0	N/A	0
997	7405	GTC	2	0	1	2	2	0	-2	1	-8.8255
998	7408	AGA	0	0	0.561098	2	0	0	0	N/A	0
999	7411	ATC	0	0	0.760334	2.23967	0	0	0	N/A	0
1000	7414	CAC	0	0	0.395222	2.60478	0	0	0	N/A	0
1001	7417	ATC	0	2	0.64505	2.35495	0	0.849275	0.849275	0.616199	3.74764
1002	7420	CAA	0	0	0.266154	2.33862	0	0	0	N/A	0
1003	7423	TCA	0	0	1	1.39522	0	0	0	N/A	0
1004	7426	TGT	0	0	0.395222	2.23967	0	0	0	N/A	0
1005	7429	CCT	0	0	1	2	0	0	0	N/A	0
1006	7432	TCA	0	0	1	1.39522	0	0	0	N/A	0
1007	7435	AGT	0	0	0.395222	2.60478	0	0	0	N/A	0
1008	7438	CGC	0	0	1	2	0	0	0	N/A	0
1009	7441	ACG	0	0	1	2	0	0	0	N/A	0
1010	7444	TTG	0	0	0.711184	1.9237	0	0	0	N/A	0
1011	7447	CTT	0	0	1	2	0	0	0	N/A	0
1012	7450	TCT	0	0	1	2	0	0	0	N/A	0
1013	7453	ACC	0	0	1	2	0	0	0	N/A	0
1014	7456	ACA	0	0	1	2	0	0	0	N/A	0
1015	7459	TCG	0	0	1	1.63489	0	0	0	N/A	0
1016	7462	TTT	0	0	0.395222	2.60478	0	0	0	N/A	0
1017	7468	ACG	2	0	1	2	2	0	-2	1	-8.8255
1018	7471	AAG	0	2	0.332431	2.23484	0	0.894919	0.894919	0.757791	3.94906
1019	7474	TTT	0	0	0.395222	2.60478	0	0	0	N/A	0
1020	7477	TAC	0	1	0.395222	2.01092	0	0.497285	0.497285	0.835745	2.19439
1021	7480	CAT	0	0	0.395222	2.60478	0	0	0	N/A	0
1022	7483	AAC	0	1	0.395222	2.60478	0	0.38391	0.38391	0.868259	1.6941
1023	7486	ATC	1	1	0.75318	2.24682	1.3277	0.445074	-0.88263	0.936969	-3.89483
1024	7489	CCT	1	1	1	2	1	0.5	-0.5	0.888889	-2.20637
1025	7495	ATT	2	1	0.683963	2.31604	2.92413	0.431772	-2.49236	0.98815	-10.9982
1026	7510	ATT	0	3	0.767892	2.23211	0	1.34402	1.34402	0.41189	5.93083
1027	7516	AAT	0	2	0.503912	2.49609	0	0.801254	0.801254	0.692273	3.53573
1028	7522	AAC	1	0	0.395222	2.60478	2.53023	0	-2.53023	1	-11.1653
1029	7525	CGT	0	3	0.968968	2.02187	0	1.48377	1.48377	0.308945	6.54751
1030	7528	ATG	0	0	0	3	0	0	0	N/A	0
1031	7534	TTG	0	0	0.711184	1.9237	0	0	0	N/A	0
1032	7537	ATT	0	0	0.760334	2.23967	0	0	0	N/A	0
1033	7540	CAA	0	1	0.266154	2.3396	0	0.427423	0.427423	0.897859	1.88611
1034	7546	GGA	0	1	0.979417	1.67856	0	0.595747	0.595747	0.631518	2.62888
1035	7549	ATA	1	2	0.735358	2.26342	1.35988	0.883619	-0.476263	0.849094	-2.10163
1036	7552	ATG	0	1	0.00118917	2.99716	0	0.333649	0.333649	0.999603	1.47231
1037	7555	AAT	0	1	0.395222	2.60478	0	0.38391	0.38391	0.868259	1.6941
1038	7558	AGT	1	1	0.395222	2.60478	2.53023	0.38391	-2.14632	0.982644	-9.47116
1039	7561	CAT	0	0	0.395222	2.60478	0	0	0	N/A	0
1040	7567	TTG	2	2	0.92198	1.82399	2.16924	1.09649	-1.07275	0.886723	-4.73378
1041	7573	CGA	1	2	1.31205	1.29212	0.762166	1.54785	0.78568	0.49426	3.46701
1042	7576	TAC	0	0	0.395222	2	0	0	0	N/A	0
1043	7579	ATA	0	1	0.733397	2.26546	0	0.441411	0.441411	0.755441	1.94784
1044	7582	ATA	0	5	0.724503	2.2555	0	2.2168	2.2168	0.248388	9.7822
1045	7597	ACT	0	2	0.989096	2.0109	0	0.994578	0.994578	0.449304	4.38882
1046	7621	GTG	1.5	1.5	0.931	2.069	1.61117	0.724988	-0.886183	0.870483	-3.9105
1047	7624	TTT	0	2	0.407297	2.58611	0	0.773362	0.773362	0.746384	3.41265
1048	7627	ATC	0	0	0.760334	2.23967	0	0	0	N/A	0
1049	7645	ATT	0	2	0.806283	2.19372	0	0.911695	0.911695	0.53471	4.02308
1050	7651	CTT	1	0	1.00727	1.99273	0.992786	0	-0.992786	1	-4.38092
1051	7654	CAA	0	4	0.296813	2.38597	0	1.67647	1.67647	0.62563	7.39784
1052	7657	ATT	0	3	0.695916	2.1885	0	1.3708	1.3708	0.436784	6.049
1053	7660	ACC	2	5	0.978263	2.01491	2.04444	2.4815	0.437061	0.585626	1.92864
1054	8755	AAT	0	1	0.395222	2.60478	0	0.38391	0.38391	0.868259	1.6941
1055	8776	TAT	0	0	0.395222	2	0	0	0	N/A	0
1056	8779	CCA	0	0	1	2	0	0	0	N/A	0
1057	8782	ACA	0	1	0.944328	2.05567	0	0.486459	0.486459	0.685224	2.14662
1058	8788	AAC	0	1	0.395222	2.60478	0	0.38391	0.38391	0.868259	1.6941
1059	8836	AAT	0	1	0.39297	2.59937	0	0.384708	0.384708	0.868675	1.69762
1060	8839	CCT	0	2	0.983037	2.01696	0	0.99159	0.99159	0.452015	4.37564
1061	8842	TCG	1.5	1.5	0.985991	1.65496	1.52131	0.906369	-0.614943	0.816937	-2.71359
1062	8845	TTT	0	0	0.395222	2.60478	0	0	0	N/A	0
1063	8848	CTG	1	1	1.36854	1.63146	0.730705	0.612948	-0.117757	0.7919	-0.519633
1064	8851	ATG	0	3	0.213811	2.75551	0	1.08873	1.08873	0.799161	4.80429
1065	8854	CAA	0	1	0.266154	2.34975	0	0.425577	0.425577	0.898255	1.87796
1066	8857	ACG	1.5	3.5	0.908984	2.08295	1.65019	1.68031	0.0301174	0.676115	0.132901
1067	8860	ATC	0	0	0.760334	2.23967	0	0	0	N/A	0
1068	8866	GGA	0	0	1	1.65798	0	0	0	N/A	0
1069	8869	CGA	1	1	1.34681	1.39382	0.742497	0.717454	-0.0250427	0.758503	-0.110507
1070	8872	AAG	0	0	0.315963	2.24514	0	0	0	N/A	0
1071	8875	GAT	0	0	0.395222	2.60478	0	0	0	N/A	0
1072	8878	TCG	0	1	0.994961	1.63993	0	0.609783	0.609783	0.62239	2.69082
1073	8881	AAC	0	0	0.395222	2.60478	0	0	0	N/A	0
1074	8884	CTC	0	0	1	2	0	0	0	N/A	0
1075	8887	CGA	0	0	1.36511	1.23967	0	0	0	N/A	0
1076	8890	GTA	1	1	0.999258	2.00074	1.00074	0.499815	-0.500927	0.889054	-2.21047
1077	8893	ACG	0.5	1.5	0.991397	2.0086	0.504339	0.746788	0.242448	0.669534	1.06986
1078	8896	GGA	0	0	1	1.65798	0	0	0	N/A	0
1079	8899	CCA	0	0	1	2	0	0	0	N/A	0
1080	8902	AAA	0	0	0.266154	2.29494	0	0	0	N/A	0
1081	8905	CCC	1	0	1	2	1	0	-1	1	-4.41275
1082	8908	GTT	0	0	1	2	0	0	0	N/A	0
1083	8911	GCC	1	1	1	2	1	0.5	-0.5	0.888889	-2.20637
1084	8914	TTA	0	0	0.661376	1.73385	0	0	0	N/A	0
1085	8917	CCG	2	0	1	2	2	0	-2	1	-8.8255
1086	8920	CTT	0	0	1	2	0	0	0	N/A	0
1087	8923	GGC	0	1	0.989448	2.01055	0	0.497376	0.497376	0.670184	2.1948
1088	8926	CAC	0	0	0.395222	2.60478	0	0	0	N/A	0
1089	8929	GCC	0	0	1	2	0	0	0	N/A	0
1090	8932	CCA	1	0	1	2	1	0	-1	1	-4.41275
1091	8935	TTT	0	0	0.395222	2.60478	0	0	0	N/A	0
1092	8941	TTT	0	0	0.395222	2.60478	0	0	0	N/A	0
1093	8947	CTA	1	2	1.36275	1.63725	0.73381	1.22156	0.487751	0.568433	2.15232
1094	8953	AAA	0	2	0.281546	2.28748	0	0.874326	0.874326	0.792825	3.85818
1095	8956	AAC	2	2	0.395222	2.60478	5.06045	0.76782	-4.29263	0.991758	-18.9423
1096	8962	GCT	2	0	1	2	2	0	-2	1	-8.8255
1097	8965	AAA	0	0	0.266154	2.29494	0	0	0	N/A	0
1098	8968	TAT	0	3	0.423105	2.00344	0	1.49743	1.49743	0.562813	6.60777
1099	8971	TGG	0	3	0.137603	2.29917	0	1.30482	1.30482	0.839978	5.75784
1100	8974	TTA	0	1	0.605704	1.91602	0	0.521916	0.521916	0.759805	2.30308
1101	8977	TTC	0	0	0.395222	2.60478	0	0	0	N/A	0
1102	8980	GTC	0	0	1	2	0	0	0	N/A	0
1103	8983	AAT	0	0	0.395222	2.60478	0	0	0	N/A	0
1104	8986	AAC	0	0	0.395222	2.60478	0	0	0	N/A	0
1105	8989	CAA	0	2	0.290821	2.38949	0	0.836999	0.836999	0.794768	3.69347
1106	9010	GAA	0	4	0.295626	2.33544	0	1.71274	1.71274	0.620794	7.55789
1107	9013	ATA	0	0	0.733846	2.26615	0	0	0	N/A	0
1108	9019	GAC	0	0	0.395222	2.60478	0	0	0	N/A	0
1109	9022	ATG	0	1	0.0139796	2.98602	0	0.334894	0.334894	0.99534	1.4778
1110	9025	TTG	1	0	0.709787	1.91838	1.40887	0	-1.40887	1	-6.217
1111	9028	TCG	0	1	1	1.63846	0	0.61033	0.61033	0.620991	2.69323
1112	9031	CTG	1	0	1.39522	1.60478	0.716732	0	-0.716732	1	-3.16276
1113	9034	GGA	0	2	0.988527	1.66923	0	1.19816	1.19816	0.394458	5.28718
1114	9040	AAC	0	1	0.409983	2.59002	0	0.386098	0.386098	0.863339	1.70375
1115	9043	ACA	0	1	0.987196	2.00515	0	0.498717	0.498717	0.670092	2.20071
1116	9076	TTG	0	1	0.698342	1.94314	0	0.514631	0.514631	0.735625	2.27094
1117	9079	ATC	0	0	0.760334	2.23967	0	0	0	N/A	0
1118	9082	ATT	0	0	0.760334	2.23967	0	0	0	N/A	0
1119	9085	ACT	1	0	1	2	1	0	-1	1	-4.41275
1120	9103	TTC	3	0	0.395222	2.60478	7.59068	0	-7.59068	1	-33.4958
1121	9106	AAT	0	3	0.395222	2.59423	0	1.15641	1.15641	0.653508	5.10297
1122	9112	GAT	0	1	0.395222	2.60478	0	0.38391	0.38391	0.868259	1.6941
1123	9115	ATT	0	1	0.764662	2.23534	0	0.44736	0.44736	0.745113	1.97409
1124	9118	GTA	0	1	1.01998	1.98002	0	0.505046	0.505046	0.660006	2.22864
1125	9124	AAA	1	0	0.276573	2.28453	3.61569	0	-3.61569	1	-15.9551
1126	9130	AAT	0	0	0.395222	2.60478	0	0	0	N/A	0
1127	9199	TAT	0	0	0.395222	2	0	0	0	N/A	0
1128	9202	TCT	0	1	0.983037	2.01696	0	0.495795	0.495795	0.672321	2.18782
1129	9205	TAT	0	1	0.395222	2.1265	0	0.470256	0.470256	0.843273	2.07512
1130	9208	TTG	1	2	0.707446	1.92777	1.41354	1.03747	-0.376069	0.822486	-1.6595
1131	9211	ATT	0	0	0.760334	2.23967	0	0	0	N/A	0
1132	9214	GGA	0	1	1	1.66427	0	0.600864	0.600864	0.624663	2.65146
1133	9220	TGT	0	1	0.395222	2.24604	0	0.445229	0.445229	0.850366	1.96468
1134	9223	AAG	1	0	0.315094	2.246	3.17366	0	-3.17366	1	-14.0046
1135	9226	GAA	0	0	0.266154	2.39183	0	0	0	N/A	0
1136	9229	GGA	0	2	0.843959	1.81346	0	1.10286	1.10286	0.465689	4.86666
1137	9232	TTC	0	1	0.401592	2.59841	0	0.384851	0.384851	0.866136	1.69825
1138	9235	TTG	0	1	0.645094	2.06616	0	0.483989	0.483989	0.762068	2.13572
1139	9238	ATT	0	0	0.760334	2.23967	0	0	0	N/A	0
1140	9241	GGG	0	2	0.979966	2.01002	0	0.995017	0.995017	0.45192	4.39076
1141	9247	AAG	0	0	0.315963	2.24514	0	0	0	N/A	0
1142	9250	TCA	0	1	1	1.39747	0	0.715577	0.715577	0.582894	3.15766
1143	9253	AAG	0	0	0.315963	2.24514	0	0	0	N/A	0
1144	9256	AAA	0	0	0.266154	2.29494	0	0	0	N/A	0
1145	9262	CAG	0	3	0.330713	2.34682	0	1.27833	1.27833	0.67334	5.64094
1146	9265	AAT	0	0	0.395222	2.60478	0	0	0	N/A	0
1147	9268	TTC	0	2	0.399574	2.59054	0	0.772041	0.772041	0.750594	3.40682
1148	9271	TTT	0	1	0.400826	2.59917	0	0.384738	0.384738	0.866391	1.69775
1149	9274	CTT	0	1	0.873498	2.1265	0	0.470256	0.470256	0.708834	2.07512
1150	9277	TTA	1.5	1.5	0.735669	1.73197	2.03896	0.866068	-1.17289	0.879929	-5.17568
1151	9280	TCT	1	2	1	2	1	1	0	0.740741	0
1152	9283	GCT	1	3	0.885095	2.11491	1.12982	1.4185	0.288681	0.660453	1.27388
1153	9286	TTT	0	2	0.48194	2.39156	0	0.836275	0.836275	0.692692	3.69027
1154	9289	TTC	1	5	0.42608	2.5038	2.34698	1.99696	-0.350016	0.78718	-1.54453
1155	9292	TTT	1	0	0.395222	2.60478	2.53023	0	-2.53023	1	-11.1653
1156	9313	AAC	0	1	0.368225	2.53997	0	0.393705	0.393705	0.873384	1.73732
1157	9316	AAC	1	0	0.395222	2.60478	2.53023	0	-2.53023	1	-11.1653
1158	9319	TCA	0	0	1	1.39522	0	0	0	N/A	0
1159	9322	ATC	0	0	0.760334	2.23967	0	0	0	N/A	0
1160	9325	CAA	0	1	0.266154	2.3396	0	0.427423	0.427423	0.897859	1.88611
1161	9328	TCT	0	0	1	2	0	0	0	N/A	0
1162	9331	GAT	0	4	0.520593	2.4722	0	1.61799	1.61799	0.465615	7.13981
1163	9334	AAT	0	1	0.395222	2.60478	0	0.38391	0.38391	0.868259	1.6941
1164	9337	TTC	0	2	0.480801	2.32474	0	0.860312	0.860312	0.686618	3.79634
1165	9340	TTA	0	3	0.648775	1.77508	0	1.69007	1.69007	0.392766	7.45784
1166	9343	TCA	0	0	1	1.39522	0	0	0	N/A	0
1167	9346	TTT	0	0	0.395222	2.60478	0	0	0	N/A	0
1168	9358	TTT	0	1	0.401031	2.59226	0	0.385764	0.385764	0.866023	1.70228
1169	9361	AAT	0	0	0.395222	2.60478	0	0	0	N/A	0
1170	9364	CTT	0	1	0.873498	2.1265	0	0.470256	0.470256	0.708834	2.07512
1171	9370	GAA	0	1	0.268987	2.38899	0	0.418586	0.418586	0.8988	1.84712
1172	9373	CAA	0	1	0.266154	2.33642	0	0.428006	0.428006	0.897734	1.88868
1173	9376	GAA	0	2	0.266154	2.38549	0	0.838403	0.838403	0.809328	3.69966
1174	9379	AAG	1	1	0.305842	2.25691	3.26966	0.443084	-2.82657	0.985758	-12.473
1175	9382	AAT	0	0	0.395222	2.60478	0	0	0	N/A	0
1176	9385	ATT	0	1	0.810465	2.18954	0	0.456718	0.456718	0.729845	2.01538
1177	9388	TGT	0	0	0.395222	2.23967	0	0	0	N/A	0
1178	9391	TAT	0	0	0.395222	2	0	0	0	N/A	0
1179	9394	GTT	0	0	1	2	0	0	0	N/A	0
1180	9400	TAT	0	0	0.395222	2	0	0	0	N/A	0
1181	9403	CTT	0	0	1	2	0	0	0	N/A	0
1182	9409	TTT	0	0	0.395222	2.60478	0	0	0	N/A	0
1183	9412	AAT	0	1	0.395222	2.60478	0	0.38391	0.38391	0.868259	1.6941
1184	9415	CTG	0	0	1.39522	1.60478	0	0	0	N/A	0
1185	9418	TAT	0	0	0.395222	2	0	0	0	N/A	0
1186	9421	CTG	1	0	1.38833	1.61167	0.720292	0	-0.720292	1	-3.17847
1187	9424	TCT	0	1	0.995611	2.00439	0	0.498905	0.498905	0.66813	2.20154
1188	9430	TTC	2	3	0.405654	2.59209	4.93031	1.15737	-3.77294	0.979978	-16.649
1189	9433	TAC	0	2	0.395222	2.01874	0	0.990717	0.990717	0.699359	4.37179
1190	9436	CCT	1	1	1	2	1	0.5	-0.5	0.888889	-2.20637
1191	9439	TTA	0	0	0.661376	1.73385	0	0	0	N/A	0
1192	9442	TTC	0	0	0.395222	2.60478	0	0	0	N/A	0
1193	9445	GAG	2	2	0.313666	2.33985	6.37621	0.854756	-5.52145	0.993979	-24.3648
1194	9451	TTT	0	0	0.395222	2.60478	0	0	0	N/A	0
1195	9454	TTT	0	0	0.395222	2.60478	0	0	0	N/A	0
1196	9457	CTT	0	2	0.889958	2.11004	0	0.947848	0.947848	0.494698	4.18262
1197	9460	CGC	0	0	1	2	0	0	0	N/A	0
1198	9463	CAA	0	0	0.266154	2.33862	0	0	0	N/A	0
1199	9466	ATT	0	0	0.760334	2.23967	0	0	0	N/A	0
1200	9469	GCC	0	0	1	2	0	0	0	N/A	0
1201	9475	GGC	0	0	1	2	0	0	0	N/A	0
1202	9478	TTA	0	0	0.661376	1.73385	0	0	0	N/A	0
1203	9481	TGC	0	1	0.388326	2.24191	0	0.446049	0.446049	0.852361	1.9683
1204	9484	CTT	0	1	0.989448	2.01055	0	0.497376	0.497376	0.670184	2.1948
1205	9487	TTT	0	0	0.395222	2.60478	0	0	0	N/A	0
1206	9493	TCC	0	0	1	2	0	0	0	N/A	0
1207	9496	AAT	0	0	0.395222	2.60478	0	0	0	N/A	0
1208	9499	CGT	0.5	1.5	0.99065	2.00475	0.504719	0.748222	0.243503	0.669277	1.07452
1209	9505	CGT	0	2	0.861902	2.1381	0	0.935411	0.935411	0.50794	4.12773
1210	9508	TAT	0	0	0.395222	2	0	0	0	N/A	0
1211	9511	GCC	0	0	1	2	0	0	0	N/A	0
1212	9514	GAT	0	3	0.61365	2.38635	0	1.25715	1.25715	0.503314	5.54749
1213	9517	TAT	0	1	0.395222	2.01055	0	0.497376	0.497376	0.83572	2.1948
1214	9520	CCC	1	1	1	2	1	0.5	-0.5	0.888889	-2.20637
1215	9523	TTT	0	0	0.395222	2.60478	0	0	0	N/A	0
1216	9526	ACT	0	1	0.91344	2.08656	0	0.479258	0.479258	0.69552	2.11484
1217	9529	ATT	0	1	0.99919	2.00081	0	0.499798	0.499798	0.666937	2.20548
1218	9532	TTT	0	0	0.395222	2.60478	0	0	0	N/A	0
1219	9535	TCT	0	0	1	2	0	0	0	N/A	0
1220	9538	CTT	0	2	0.94827	2.05173	0	0.974787	0.974787	0.467733	4.30149
1221	9541	AGC	0	0	0.395222	2.60478	0	0	0	N/A	0
1222	9544	CTT	0	0	1	2	0	0	0	N/A	0
1223	9547	TGT	0	1	0.395222	2.23548	0	0.44733	0.44733	0.849766	1.97396
1224	9550	TTG	0	0	0.711184	1.9237	0	0	0	N/A	0
1225	9553	GCA	0	0	1	2	0	0	0	N/A	0
1226	9556	AGC	0	0	0.395222	2.60478	0	0	0	N/A	0
1227	9562	TGT	0	0	0.395222	2.23967	0	0	0	N/A	0
1228	9565	AAG	0	0	0.315963	2.24514	0	0	0	N/A	0
1229	9568	TTT	0	1	0.401592	2.59841	0	0.384851	0.384851	0.866136	1.69825
1230	9571	TCG	0	0	1	1.63489	0	0	0	N/A	0
1231	9574	ATA	0	0	0.733846	2.26615	0	0	0	N/A	0
1232	9577	AAA	0	0	0.266154	2.29494	0	0	0	N/A	0
1233	9580	AGA	1	3	0.409558	2.40465	2.44166	1.24758	-1.19408	0.896235	-5.26916
1234	9583	AAA	0	1	0.266154	2.29672	0	0.435403	0.435403	0.89615	1.92132
1235	9586	TCT	3	1	0.989448	1.97212	3.03199	0.507069	-2.52492	0.987541	-11.1419
1236	9589	CAA	0	3	1.22374	1.50583	0	1.99226	1.99226	0.167898	8.79133
1237	9592	TTC	0	0	0.395222	2.60478	0	0	0	N/A	0
1238	9595	AAT	0	0	0.395222	2.60478	0	0	0	N/A	0
1239	9610	TTT	0	0	0.395222	2.60478	0	0	0	N/A	0
1240	9613	CTT	0	4	0.994421	2.00558	0	1.99444	1.99444	0.199744	8.80095
1241	9625	AAA	0	0	0.266154	2.29494	0	0	0	N/A	0
1242	9628	AAG	0	2	0.319617	2.26172	0	0.884284	0.884284	0.767694	3.90212
1243	9631	ATG	0	2	0.0810019	2.84938	0	0.701906	0.701906	0.94548	3.09734
1244	9634	AGA	0	3	0.597813	2.05657	0	1.45874	1.45874	0.465093	6.43706
1245	9637	TTT	0	0	0.395222	2.60478	0	0	0	N/A	0
1246	9643	TTC	0.5	2.5	0.41504	2.55253	1.2047	0.979419	-0.225284	0.79158	-0.994124
1247	9649	AAA	0	0	0.266154	2.29494	0	0	0	N/A	0
1248	9655	ATA	0	0	0.733846	2.26615	0	0	0	N/A	0
1249	9658	AGA	0	0	0.561098	2	0	0	0	N/A	0
1250	9667	ATA	0.5	3.5	0.629826	2.27434	0.79387	1.53891	0.745036	0.584449	3.28766
1251	9688	AAA	0	4	0.317109	2.27607	0	1.75742	1.75742	0.593488	7.75505
1252	9691	TTA	0	0	0.661376	1.73385	0	0	0	N/A	0
1253	9694	GGA	0	2	0.979764	1.67375	0	1.19492	1.19492	0.397867	5.27289
1254	9697	ACC	0	0	1	2	0	0	0	N/A	0
1255	9700	CTC	0	0	1	2	0	0	0	N/A	0
1256	9703	GAT	0	0	0.395222	2.60478	0	0	0	N/A	0
1257	9706	TCA	0	0	1	1.39522	0	0	0	N/A	0
1258	9709	AAA	0	0	0.266154	2.29494	0	0	0	N/A	0
1259	9712	AGC	0	2	0.405773	2.59423	0	0.770943	0.770943	0.747779	3.40198
1260	9715	GAA	1	4	0.270553	2.38618	3.69613	1.67632	-2.01981	0.915845	-8.91291
1261	9718	ATT	0	0	0.760334	2.23967	0	0	0	N/A	0
1262	9721	CTG	2.5	2.5	1.12447	1.87553	2.22328	1.33295	-0.890322	0.827994	-3.92877
1263	9724	ATA	0	2	0.820437	2.17956	0	0.917615	0.917615	0.527833	4.04921
1264	9727	TTT	0	1	0.521723	2.47828	0	0.403506	0.403506	0.826092	1.78057
1265	9781	ATA	1.5	3.5	0.667893	2.30899	2.24587	1.51581	-0.730055	0.804213	-3.22155
1266	9784	AGG	2.5	2.5	0.546048	2.34745	4.57836	1.06499	-3.51337	0.972498	-15.5036
1267	9790	GGG	0	3	0.898457	2.09052	0	1.43505	1.43505	0.342133	6.33252
1268	9793	GGC	2	0	1	1.99403	2	0	-2	1	-8.8255
1269	9796	GAT	0	2	0.395222	2.60478	0	0.76782	0.76782	0.753875	3.3882
1270	9799	GAT	0	1	0.395222	2.60478	0	0.38391	0.38391	0.868259	1.6941
1271	9802	CTT	0	1	0.873498	2.1265	0	0.470256	0.470256	0.708834	2.07512
1272	9820	CTT	0	0	1	2	0	0	0	N/A	0
1273	9823	CTT	0	5	0.747213	2.25279	0	2.21947	2.21947	0.238778	9.79398
1274	9826	TCT	0	0	1	2	0	0	0	N/A	0
1275	9829	TCT	0	3	0.864893	2.09592	0	1.43135	1.43135	0.354725	6.31619
1276	9832	TTT	0	0	0.395222	2.60478	0	0	0	N/A	0
1277	9835	GTT	0	0	1	2	0	0	0	N/A	0
1278	9838	CTG	0	0	1.39522	1.60478	0	0	0	N/A	0
1279	9841	ACC	0	0	1	2	0	0	0	N/A	0
1280	9844	TTT	0	0	0.395222	2.60478	0	0	0	N/A	0
1281	9847	CCT	0	1	1	2	0	0.5	0.5	0.666667	2.20637
1282	9850	TTA	0	0	0.661376	1.73385	0	0	0	N/A	0
1283	9856	GAT	0	1	0.395222	2.60253	0	0.384242	0.384242	0.86816	1.69556
1284	9859	TCC	2	3	1.01822	1.98178	1.96421	1.51379	-0.450417	0.781044	-1.98758
1285	9874	ATA	0	0	0.733846	2.26615	0	0	0	N/A	0
1286	9877	AAA	0	1	0.266154	2.33813	0	0.427693	0.427693	0.897801	1.8873
1287	9880	TAT	2	1	0.39654	2	5.04363	0.5	-4.54363	0.99547	-20.0499
1288	9883	CTA	2	2	1.3595	1.63918	1.47113	1.22012	-0.251002	0.753999	-1.10761
1289	9907	TAT	0	0	0.395222	2	0	0	0	N/A	0
1290	9910	GGC	0	0	1	2	0	0	0	N/A	0
1291	9913	AAG	0	2	0.317074	2.25018	0	0.888818	0.888818	0.76824	3.92213
1292	9916	AAA	0	1	0.266458	2.29567	0	0.435602	0.435602	0.896001	1.9222
1293	9919	TCT	0	1	0.873498	2.1265	0	0.470256	0.470256	0.708834	2.07512
1294	9922	TTG	0	1	0.716223	1.91866	0	0.521196	0.521196	0.728177	2.29991
1295	9925	GTA	0	1	0.999209	2.00079	0	0.499802	0.499802	0.66693	2.2055
1296	9934	AAA	0	1	0.266154	2.31521	0	0.431926	0.431926	0.896894	1.90598
1297	9937	ATA	1	0	0.734223	2.26578	1.36198	0	-1.36198	1	-6.0101
1298	9943	ATC	1	0	0.760334	2.23967	1.31521	0	-1.31521	1	-5.8037
1299	9985	ATT	0	2	0.75453	2.24201	0	0.892058	0.892058	0.559802	3.93643
1300	9988	AGA	0.5	1.5	0.573643	1.99391	0.871622	0.752292	-0.11933	0.77658	-0.526576
1301	9991	AAG	0	3	0.341541	2.3612	0	1.27054	1.27054	0.666784	5.60658
1302	9994	AAA	0	0	0.266154	2.29494	0	0	0	N/A	0
1303	9997	TTC	2	0	0.395222	2.60478	5.06045	0	-5.06045	1	-22.3305
1304	10000	GTA	2	0	1	2	2	0	-2	1	-8.8255
1305	10003	AAA	0	2	0.272697	2.30009	0	0.869533	0.869533	0.799249	3.83703
1306	10006	ATA	0	7	0.561317	2.39033	0	2.92846	2.92846	0.228431	12.9226
1307	10009	AAT	0	1	0.395222	2.60478	0	0.38391	0.38391	0.868259	1.6941
1308	10030	CCT	0	3	0.842095	2.1579	0	1.39024	1.39024	0.372163	6.13477
1309	10033	TCT	0	4	0.980275	2.01972	0	1.98047	1.98047	0.205439	8.73931
1310	10036	TTT	0	0	0.395222	2.60478	0	0	0	N/A	0
1311	10039	TTC	0	0	0.395222	2.60478	0	0	0	N/A	0
1312	10042	ATC	1	0	0.760053	2.23995	1.3157	0	-1.3157	1	-5.80585
1313	10045	TTT	0	1	0.395964	2.60318	0	0.384146	0.384146	0.867974	1.69514
1314	10048	AGA	0	2	0.563333	2.00542	0	0.997296	0.997296	0.60949	4.40082
1315	10051	GCG	1	2	1	2	1	1	0	0.740741	0
1316	10054	TCA	0	0	1	1.39522	0	0	0	N/A	0
1317	10057	TAT	1	0	0.395222	2	2.53023	0	-2.53023	1	-11.1653
1318	10060	CAA	0	0	0.266154	2.33862	0	0	0	N/A	0
1319	10063	AAT	0	2	0.392195	2.59586	0	0.770459	0.770459	0.754719	3.39984
1320	10066	AGT	0	1	0.395222	2.60478	0	0.38391	0.38391	0.868259	1.6941
1321	10081	GTG	1	2	0.983475	2.01653	1.0168	0.991805	-0.0249977	0.748055	-0.110309
1322	10087	GTC	0	0	1	2	0	0	0	N/A	0
1323	10090	GTA	0	1	0.995356	2.00464	0	0.498842	0.498842	0.668215	2.20126
1324	10093	AAA	0	0	0.266154	2.29494	0	0	0	N/A	0
1325	10099	GCG	0	1	1	2	0	0.5	0.5	0.666667	2.20637
1326	10102	ATC	0	0	0.760334	2.23967	0	0	0	N/A	0
1327	10105	TAT	0	0	0.395222	2	0	0	0	N/A	0
1328	10108	TTC	0	0	0.395222	2.60478	0	0	0	N/A	0
1329	10111	CTT	0	0	1	2	0	0	0	N/A	0
1330	10135	TCT	0	0	1	2	0	0	0	N/A	0
1331	10141	CTT	0	1	0.989448	2.01055	0	0.497376	0.497376	0.670184	2.1948
1332	10144	GGA	0	0	1	1.65798	0	0	0	N/A	0
1333	10147	GAT	0	0	0.395222	2.60478	0	0	0	N/A	0
1334	10153	GTA	0	3	1	2	0	1.5	1.5	0.296296	6.61912
1335	10156	ATG	0	0	0	3	0	0	0	N/A	0
1336	10159	CTT	0	0	1	2	0	0	0	N/A	0
1337	10162	ACT	0	0	1	2	0	0	0	N/A	0
1338	10165	CTT	0	2	1	2	0	1	1	0.444444	4.41275
1339	10168	AAA	0	1	0.268406	2.30035	0	0.434717	0.434717	0.895511	1.9183
1340	10171	CTA	1	1	1.37106	1.62894	0.729364	0.613895	-0.115468	0.791133	-0.509532
1341	10174	TTC	0	0	0.395222	2.60478	0	0	0	N/A	0
1342	10177	GTT	2	0	1	2	2	0	-2	1	-8.8255
1343	10180	TAC	0	0	0.395222	2	0	0	0	N/A	0
1344	10183	ACA	0	1	0.995356	2.00464	0	0.498842	0.498842	0.668215	2.20126
1345	10186	GTA	0	0	1	2	0	0	0	N/A	0
1346	10189	GTA	0	0	1	2	0	0	0	N/A	0
1347	10192	ATA	0	0	0.733846	2.26615	0	0	0	N/A	0
1348	10195	TTC	1	0	0.395222	2.60478	2.53023	0	-2.53023	1	-11.1653
1349	10198	TTT	0	0	0.395222	2.60478	0	0	0	N/A	0
1350	10201	GTT	0	1	0.989448	2.01055	0	0.497376	0.497376	0.670184	2.1948
1351	10204	TCT	0	0	1	2	0	0	0	N/A	0
1352	10207	CTC	1	0	1.0069	1.9931	0.993152	0	-0.993152	1	-4.38253
1353	10210	TTC	0	0	0.395222	2.60478	0	0	0	N/A	0
1354	10213	ATC	0	0	0.760334	2.23967	0	0	0	N/A	0
1355	10216	TTC	0	0	0.395222	2.60478	0	0	0	N/A	0
1356	10219	GGA	0	1	0.992342	1.66395	0	0.60098	0.60098	0.626418	2.65197
1357	10222	TTC	0	0	0.395222	2.60478	0	0	0	N/A	0
1358	10225	TTA	0	0	0.661376	1.73385	0	0	0	N/A	0
1359	10228	TCT	0	0	1	2	0	0	0	N/A	0
1360	10231	AAT	0	0	0.395222	2.60478	0	0	0	N/A	0
1361	10234	GAT	0	0	0.395222	2.60478	0	0	0	N/A	0
1362	10237	CCG	1	1	1	1.99084	1	0.5023	-0.4977	0.888207	-2.19623
1363	10240	GGG	1	0	1	1.92846	1	0	-1	1	-4.41275
1364	10243	CGT	0	0	1	2	0	0	0	N/A	0
1365	10246	AAT	0	0	0.395222	2.60478	0	0	0	N/A	0
1366	10249	CCT	1	1	1	2	1	0.5	-0.5	0.888889	-2.20637
1367	10252	GGG	3.5	2.5	0.990049	1.98717	3.53518	1.25807	-2.27711	0.941503	-10.0483
1368	10255	CGT	0	1	0.989448	2.01055	0	0.497376	0.497376	0.670184	2.1948
1369	10258	GAA	0	1	0.266154	2.39014	0	0.418386	0.418386	0.899802	1.84623
1370	10261	GAA	0	0	0.266154	2.39183	0	0	0	N/A	0
1371	10267	AAA	0	0	0.266154	2.29494	0	0	0	N/A	0
1372	10279	GAT	0	0	0.395222	2.60478	0	0	0	N/A	0
1373	10282	GAG	0	1	0.332541	2.39698	0	0.417192	0.417192	0.878169	1.84096
1374	10285	ATT	0	0	0.760334	2.23967	0	0	0	N/A	0
1375	10288	CGT	0	4	0.871111	2.05889	0	1.9428	1.9428	0.243815	8.57307
1376	10291	TTT	1	0	0.395222	2.60478	2.53023	0	-2.53023	1	-11.1653
1377	10303	TTT	0	1	0.405773	2.59423	0	0.385471	0.385471	0.864742	1.70099
1378	10306	TTC	2	4	0.558296	2.4417	3.58233	1.6382	-1.94413	0.917452	-8.57895
1379	10309	ATA	1	2	0.709948	2.10789	1.40855	0.948816	-0.459739	0.841553	-2.02871
1380	10318	TCA	0	0	1	1.39522	0	0	0	N/A	0
1381	10324	GTA	3	0	1	2	3	0	-3	1	-13.2382
1382	10327	AAT	0	0	0.395222	2.60478	0	0	0	N/A	0
1383	10330	GTA	0	1	0.997741	1.99822	0	0.500444	0.500444	0.666972	2.20834
1384	10336	ATA	0	5	0.675414	2.31669	0	2.15826	2.15826	0.278263	9.52384
1385	10345	ATA	0	0	0.733846	2.26615	0	0	0	N/A	0
1386	10348	GAT	0	0	0.395222	2.60478	0	0	0	N/A	0
1387	10351	GCT	0	2	1	2	0	1	1	0.444444	4.41275
1388	10354	AGA	0	2	0.548629	2.01247	0	0.993804	0.993804	0.617456	4.38541
1389	10360	AGA	0	1	0.562299	2.00185	0	0.499538	0.499538	0.780707	2.20434
1390	10366	AAG	1	0	0.305544	2.25555	3.27285	0	-3.27285	1	-14.4423
1391	10369	ATT	0	0	0.760334	2.23967	0	0	0	N/A	0
1392	10372	CAT	0	2	0.413113	2.58689	0	0.77313	0.77313	0.743554	3.41163
1393	10375	AAA	0	0	0.266154	2.29494	0	0	0	N/A	0
1394	10381	AAA	0	1	0.293151	2.35975	0	0.423773	0.423773	0.889498	1.87001
1395	10387	TCG	1	1	1	1.71126	1	0.584365	-0.415635	0.863963	-1.83409
1396	10390	AAA	0	0	0.266154	2.29494	0	0	0	N/A	0
1397	10393	TTT	0	4	0.408944	2.59106	0	1.54377	1.54377	0.556445	6.81228
1398	10396	CTT	0	3	0.985717	2.01428	0	1.48936	1.48936	0.30269	6.57219
1399	10399	TTG	3	6	1.00575	1.99301	2.98284	3.01052	0.0276832	0.645246	0.122159
1400	10402	ATT	0	0	0.760334	2.23967	0	0	0	N/A	0
1401	10405	CTA	0	6	1.33341	1.65388	0	3.62784	3.62784	0.0287978	16.0088
1402	10408	AAA	0	0	0.266154	2.29494	0	0	0	N/A	0
1403	10423	CTC	0	3	0.871359	2.12864	0	1.40935	1.40935	0.357226	6.21911
1404	10426	AAG	0	0	0.315963	2.24514	0	0	0	N/A	0
1405	10441	GGG	0	3	0.850232	2.07319	0	1.44704	1.44704	0.356651	6.38544
1406	10444	TCG	0	1	0.990223	1.64206	0	0.608993	0.608993	0.623815	2.68733
1407	10447	GAG	2	0	0.313697	2.34428	6.37559	0	-6.37559	1	-28.1339
1408	10450	AGA	0	0	0.561098	2	0	0	0	N/A	0
1409	10453	GAG	0	1	0.317869	2.34107	0	0.427156	0.427156	0.880453	1.88493
1410	10456	GGA	0	0	1	1.65798	0	0	0	N/A	0
1411	10459	TTC	0	0	0.395222	2.60478	0	0	0	N/A	0
1412	10462	GAA	0	0	0.266154	2.39183	0	0	0	N/A	0
1413	10465	CCC	0	0	1	2	0	0	0	N/A	0
1414	10468	TCG	0	0	1	1.63489	0	0	0	N/A	0
1415	10471	GTA	0	0	1	2	0	0	0	N/A	0
1416	10474	CGA	0	0	1.36511	1.23967	0	0	0	N/A	0
1417	10477	ATA	0	1	0.636019	2.27218	0	0.440107	0.440107	0.781301	1.94208
1418	10480	ATT	0	1	0.750093	2.24991	0	0.444463	0.444463	0.749969	1.9613
1419	10483	CGT	0	1	0.873498	2.1265	0	0.470256	0.470256	0.708834	2.07512
1420	10486	ACA	0	0	1	2	0	0	0	N/A	0
1421	10489	ACG	0	0	1	2	0	0	0	N/A	0
1422	10492	GAT	0	0	0.395222	2.60478	0	0	0	N/A	0
1423	10498	CAA	0	0	0.266154	2.33862	0	0	0	N/A	0
1424	10501	TCC	0	0	1	2	0	0	0	N/A	0
1425	10504	GAC	0	0	0.395222	2.60478	0	0	0	N/A	0
1426	10507	GCT	0	0	1	2	0	0	0	N/A	0
1427	10510	TTA	0	0	0.661376	1.73385	0	0	0	N/A	0
1428	10513	GTC	0	0	1	2	0	0	0	N/A	0
1429	10516	CAC	0	0	0.395222	2.60478	0	0	0	N/A	0
1430	10519	TCA	0	0	1	1.39522	0	0	0	N/A	0
1431	10522	GCC	0	0	1	2	0	0	0	N/A	0
1432	10525	ATC	0	0	0.760334	2.23967	0	0	0	N/A	0
1433	10528	TCT	0	0	1	2	0	0	0	N/A	0
1434	10543	CCC	0	0	1	2	0	0	0	N/A	0
1435	10546	CAT	0	0	0.395222	2.60478	0	0	0	N/A	0
1436	10549	TCC	2	1	0.98908	2.00744	2.02208	0.498147	-1.52393	0.964038	-6.72474
1437	10552	AAA	0	1	0.266154	2.30408	0	0.434013	0.434013	0.896447	1.91519
1438	10555	TTG	1	2	0.705385	1.93042	1.41767	1.03605	-0.38162	0.823476	-1.68399
1439	10558	GAA	0	0	0.266154	2.39183	0	0	0	N/A	0
1440	10561	ATC	1	0	0.760334	2.23967	1.31521	0	-1.31521	1	-5.8037
1441	10564	TCT	1	3	0.97467	2	1.02599	1.5	0.474012	0.602684	2.0917
1442	10567	CAT	0	0	0.395222	2.60478	0	0	0	N/A	0
1443	10570	GTG	1	0	1	2	1	0	-1	1	-4.41275
1444	10573	ATT	1	0	0.754793	2.24521	1.32487	0	-1.32487	1	-5.8463
1445	10579	CAC	0	1	0.395222	2.58782	0	0.386426	0.386426	0.86751	1.7052
1446	10597	GTG	3	0	1	2	3	0	-3	1	-13.2382
1447	10600	AAG	0	1	0.318186	2.25522	0	0.443415	0.443415	0.876356	1.95668
1448	10606	TTG	0	2	0.696881	1.94445	0	1.02857	1.02857	0.541935	4.53883
1449	10609	AGA	0	1	0.559158	2.00194	0	0.499516	0.499516	0.781673	2.20424
1450	10612	ACC	1	1	0.979417	2.00827	1.02102	0.49794	-0.523075	0.892536	-2.3082
1451	10615	ATT	2	1	0.758258	2.24174	2.63762	0.446082	-2.19154	0.983853	-9.67072
1452	10618	TTT	0	3	0.409689	2.57348	0	1.16574	1.16574	0.641991	5.14411
1453	10621	ATT	0	5	0.778633	2.22137	0	2.25087	2.25087	0.222585	9.93251
1454	10624	TTC	0	0	0.395222	2.60478	0	0	0	N/A	0
1455	10660	AAC	1	0	0.395222	2.60478	2.53023	0	-2.53023	1	-11.1653
1456	10663	AGA	0	4	0.634452	1.95147	0	2.04974	2.04974	0.324328	9.045
1457	10666	TTT	0	0	0.395222	2.60478	0	0	0	N/A	0
1458	10669	CTC	0	3	0.994086	2.00591	0	1.49558	1.49558	0.298932	6.59961
1459	10672	CAA	0	2	0.272886	2.33429	0	0.856791	0.856791	0.801621	3.7808
1460	10690	GAA	0	1	0.266154	2.39014	0	0.418386	0.418386	0.899802	1.84623
1461	10693	AGA	0	0	0.561098	2	0	0	0	N/A	0
1462	10696	ATA	0	0	0.733846	2.26615	0	0	0	N/A	0
1463	10699	CCT	0	0	1	2	0	0	0	N/A	0
1464	10702	TAC	0	0	0.395222	2	0	0	0	N/A	0
1465	10705	TTC	0	2	0.403902	2.57637	0	0.776285	0.776285	0.747317	3.42555
1466	10714	TTT	0	0	0.395222	2.60478	0	0	0	N/A	0
1467	10726	TAC	0	0	0.395222	2	0	0	0	N/A	0
1468	10729	AAA	0	0	0.266154	2.29494	0	0	0	N/A	0
1469	10732	AGG	0	3	0.565236	2.42684	0	1.23618	1.23618	0.533587	5.45494
1470	10735	TTC	1	0	0.395222	2.60478	2.53023	0	-2.53023	1	-11.1653
1471	10738	ATT	0	0	0.760334	2.23967	0	0	0	N/A	0
1472	10741	TCC	0	0	1	2	0	0	0	N/A	0
1473	10744	CCG	0	0	1	2	0	0	0	N/A	0
1474	10747	GCC	0	0	1	2	0	0	0	N/A	0
1475	10762	AAG	0	0	0.315963	2.24514	0	0	0	N/A	0
1476	10765	TAC	0	0	0.395222	2	0	0	0	N/A	0
1477	10768	TGG	0	0	0	2.36807	0	0	0	N/A	0
1478	10771	CCG	1	0	1	2	1	0	-1	1	-4.41275
1479	10774	GGC	0	0	1	2	0	0	0	N/A	0
1480	10777	CAG	0	1	0.318315	2.28732	0	0.437192	0.437192	0.877836	1.92922
1481	10780	TAC	0	0	0.395222	2	0	0	0	N/A	0
1482	11137	TTT	1	3	0.400353	2.5826	2.49779	1.16162	-1.33617	0.910288	-5.8962
1483	11152	TTA	0	6	0.66745	1.87497	0	3.20005	3.20005	0.160873	14.121
1484	11206	ATC	2	0	0.754986	2.24501	2.64906	0	-2.64906	1	-11.6896
1485	11263	TAT	0	1	0.395222	2.00441	0	0.498901	0.498901	0.835299	2.20152
1486	11266	AGT	1	5	0.408579	2.59142	2.44751	1.92944	-0.518065	0.80843	-2.28609
1487	11608	TTT	0	1	0.450893	2.42261	0	0.412779	0.412779	0.843086	1.82149
1488	11611	CTA	0	0	1.39522	1.60478	0	0	0	N/A	0
1489	11830	CTA	3	0	1.3037	1.69499	2.30115	0	-2.30115	1	-10.1544
1490	11845	TTT	0	2	0.401926	2.59807	0	0.769801	0.769801	0.749999	3.39694
1491	11860	CCC	1	6	0.999126	2.00087	1.00087	2.99869	1.99782	0.263912	8.81586
1492	11878	CAA	0	1	0.268601	2.33703	0	0.427893	0.427893	0.896915	1.88818
1493	11881	AAT	0	1	0.395222	2.60478	0	0.38391	0.38391	0.868259	1.6941
1494	11884	ACG	0	1	0.998308	2.00061	0	0.499848	0.499848	0.66711	2.20571
1495	11887	TGT	0	2	0.412184	2.22527	0	0.898765	0.898765	0.711862	3.96603
1496	11896	TGC	0	0	0.395222	2.23967	0	0	0	N/A	0
1497	11899	TGG	0	1	0.0826686	2.34122	0	0.427129	0.427129	0.965894	1.88481
1498	11902	AAT	0	0	0.395222	2.60478	0	0	0	N/A	0
1499	11905	TTT	0	3	0.416209	2.57742	0	1.16395	1.16395	0.638207	5.13624
1500	11920	TTC	0	1	0.396213	2.60153	0	0.384388	0.384388	0.86783	1.69621
1501	11926	TGC	0	2	0.395222	2.18612	0	0.914861	0.914861	0.717228	4.03705
1502	11941	GTC	0	1	0.998202	2.0018	0	0.499551	0.499551	0.667266	2.20439
1503	11947	TTA	0	1	0.657414	1.74681	0	0.572472	0.572472	0.726559	2.52618
1504	11953	TTG	0	1	0.706688	1.93339	0	0.517225	0.517225	0.732323	2.28238
1505	11956	TTG	0	0	0.711184	1.9237	0	0	0	N/A	0
1506	11959	GAC	0	0	0.395222	2.60478	0	0	0	N/A	0
1507	11962	AAA	0	0	0.266154	2.29494	0	0	0	N/A	0
1508	11968	TCC	0	2	0.971918	2.02137	0	0.989428	0.989428	0.456031	4.3661
1509	11971	ATT	0	0	0.760334	2.23967	0	0	0	N/A	0
1510	11974	CAT	0	1	0.450671	2.54933	0	0.39226	0.39226	0.849776	1.73095
1511	11977	ATC	1	0	0.760272	2.23973	1.31532	0	-1.31532	1	-5.80417
1512	11998	ATA	0	0	0.733846	2.26615	0	0	0	N/A	0
1513	12001	TGT	0	1	0.395222	2.23294	0	0.447839	0.447839	0.849621	1.9762
1514	12004	AGC	0	0	0.395222	2.60478	0	0	0	N/A	0
1515	12007	GGG	0	0	1	2	0	0	0	N/A	0
1516	12010	TAT	0	0	0.395222	2	0	0	0	N/A	0
1517	12013	AGT	0	0	0.395222	2.60478	0	0	0	N/A	0
1518	12016	TTA	0	0	0.661376	1.73385	0	0	0	N/A	0
1519	12019	GTG	0	0	1	2	0	0	0	N/A	0
1520	12022	GTA	0	0	1	2	0	0	0	N/A	0
1521	12025	AAA	0	0	0.266154	2.29494	0	0	0	N/A	0
1522	12028	GTG	0	0	1	2	0	0	0	N/A	0
1523	12034	TTC	0	0	0.395222	2.60478	0	0	0	N/A	0
1524	12037	GTT	0	0	1	2	0	0	0	N/A	0
1525	12040	CTA	0	0	1.39522	1.60478	0	0	0	N/A	0
1526	12043	TTA	0	0	0.661376	1.73385	0	0	0	N/A	0
1527	12046	ACA	1	2	0.975881	2.01181	1.02471	0.99413	-0.0305843	0.749628	-0.134961
1528	12049	ACT	0	2	0.998579	2.00142	0	0.99929	0.99929	0.445076	4.40962
1529	12055	ATA	0	0	0.733846	2.26615	0	0	0	N/A	0
1530	12058	GTT	0	0	1	2	0	0	0	N/A	0
1531	12061	AAG	0	0	0.315963	2.24514	0	0	0	N/A	0
1532	12064	GGG	1	0	1	1.99513	1	0	-1	1	-4.41275
1533	12067	TCT	0	0	1	2	0	0	0	N/A	0
1534	12070	TTC	1	0	0.395222	2.60478	2.53023	0	-2.53023	1	-11.1653
1535	12082	TTT	0	2	0.398928	2.59737	0	0.770011	0.770011	0.751445	3.39787
1536	12085	TTT	0	1	0.401935	2.59807	0	0.384902	0.384902	0.866022	1.69848
1537	12091	TAT	0	0	0.395222	2	0	0	0	N/A	0
1538	12094	TCC	0	0	1	2	0	0	0	N/A	0
1539	12097	GAT	0	1	0.395222	2.60478	0	0.38391	0.38391	0.868259	1.6941
1540	12100	CAA	0	1	0.266154	2.3374	0	0.427826	0.427826	0.897773	1.88789
1541	12103	AAA	0	0	0.266154	2.29494	0	0	0	N/A	0
1542	12106	CTT	0	0	1	2	0	0	0	N/A	0
1543	12109	TAT	0	0	0.395222	2	0	0	0	N/A	0
1544	12112	TTC	0	0	0.395222	2.60478	0	0	0	N/A	0
1545	12118	AAA	0	0	0.266154	2.29494	0	0	0	N/A	0
1546	12121	AGA	0	1	0.558103	2.01092	0	0.497285	0.497285	0.782757	2.19439
1547	12124	TTT	0	0	0.395222	2.60478	0	0	0	N/A	0
1548	12127	AAT	2	3	0.395222	2.60328	5.06045	1.15239	-3.90806	0.98139	-17.2453
1549	12130	CCT	0	3	1	2	0	1.5	1.5	0.296296	6.61912
1550	12133	TTC	1	1	0.491349	2.29022	2.03521	0.436639	-1.59858	0.968797	-7.05411
1551	12136	CCC	0	3	0.997665	2.00233	0	1.49825	1.49825	0.297335	6.61141
1552	12139	CTC	0	0	1	2	0	0	0	N/A	0
1553	12142	AAT	0	0	0.395222	2.60478	0	0	0	N/A	0
1554	12145	AGG	1	0	0.610037	2.38231	1.63924	0	-1.63924	1	-7.23358
1555	12148	ACA	0	1	0.944328	2.05567	0	0.486459	0.486459	0.685224	2.14662
1556	12151	TTT	1	0	0.395222	2.60478	2.53023	0	-2.53023	1	-11.1653
1557	12154	GAG	0	0	0.315963	2.34202	0	0	0	N/A	0
1558	12157	GAA	0	0	0.266154	2.39183	0	0	0	N/A	0
1559	12160	AGA	0	0	0.561098	2	0	0	0	N/A	0
1560	12163	ATA	1	0	0.736274	2.26373	1.35819	0	-1.35819	1	-5.99335
1561	12169	ATT	0	0	0.760334	2.23967	0	0	0	N/A	0
1562	12172	CTC	0	0	1	2	0	0	0	N/A	0
1563	12175	ACG	0	0	1	2	0	0	0	N/A	0
1564	12178	ATT	0	0	0.760334	2.23967	0	0	0	N/A	0
1565	12181	TCT	0	1	1	2	0	0.5	0.5	0.666667	2.20637
1566	12184	ATC	0	0	0.760334	2.23967	0	0	0	N/A	0
1567	12196	ATC	2	0	0.759885	2.24011	2.63198	0	-2.63198	1	-11.6143
1568	12199	AGA	0	1	0.499405	2.06169	0	0.485038	0.485038	0.805004	2.14035
1569	12202	ATC	1	0	0.760334	2.23967	1.31521	0	-1.31521	1	-5.8037
1570	12208	ATA	0	0	0.733846	2.26615	0	0	0	N/A	0
1571	12211	AAA	0	1	0.27105	2.29298	0	0.436114	0.436114	0.894287	1.92446
1572	12226	TTG	0	0	0.711184	1.9237	0	0	0	N/A	0
1573	12229	GAT	0	0	0.395222	2.60478	0	0	0	N/A	0
1574	12232	TAT	0	0	0.395222	2	0	0	0	N/A	0
1575	12235	GGA	0	0	1	1.65798	0	0	0	N/A	0
1576	12238	GTC	0	0	1	2	0	0	0	N/A	0
1577	12241	GAG	0	0	0.315963	2.34202	0	0	0	N/A	0
1578	12244	AAG	1	0	0.315094	2.246	3.17366	0	-3.17366	1	-14.0046
1579	12259	TTT	0	0	0.395222	2.60478	0	0	0	N/A	0
1580	12262	TTT	0	0	0.395222	2.60478	0	0	0	N/A	0
1581	12268	TTG	0	0	0.711184	1.9237	0	0	0	N/A	0
1582	12271	GTT	0	0	1	2	0	0	0	N/A	0
1583	12274	CAA	0	4	0.275066	2.33204	0	1.71523	1.71523	0.640191	7.5689
1584	12277	TTT	1	0	0.395222	2.60478	2.53023	0	-2.53023	1	-11.1653
1585	12286	ATT	0	0	0.760334	2.23967	0	0	0	N/A	0
1586	12295	GTA	0	1	0.992535	2.00747	0	0.498141	0.498141	0.669155	2.19817
1587	12301	ATA	0	0	0.733846	2.26615	0	0	0	N/A	0
1588	12304	AAG	1	0	0.315047	2.24605	3.17413	0	-3.17413	1	-14.0066
1589	12307	GAT	0	0	0.395222	2.60478	0	0	0	N/A	0
1590	12310	CTA	0	0	1.39522	1.60478	0	0	0	N/A	0
1591	12313	TGG	0	0	0	2.36807	0	0	0	N/A	0
1592	12316	ATG	0.5	2.5	0.219422	2.78058	2.27872	0.899094	-1.37962	0.890485	-6.08793
1593	12319	ATA	0	0	0.733846	2.26615	0	0	0	N/A	0
1594	12322	GTA	0	0	1	2	0	0	0	N/A	0
1595	12325	CAA	0	0	0.266154	2.33862	0	0	0	N/A	0
1596	12328	AAC	1	0	0.395222	2.60478	2.53023	0	-2.53023	1	-11.1653
1597	12331	TTT	0	1	0.40077	2.59923	0	0.384729	0.384729	0.86641	1.69771
1598	12334	CAA	0	0	0.266154	2.33862	0	0	0	N/A	0
1599	12337	TCG	0	0	1	1.63489	0	0	0	N/A	0
1600	12343	CTA	0	0	1.39522	1.60478	0	0	0	N/A	0
1601	12355	CTT	0	0	1	2	0	0	0	N/A	0
1602	12358	CAA	0	0	0.266154	2.33862	0	0	0	N/A	0
1603	12361	TTT	0	2	0.408617	2.59138	0	0.771789	0.771789	0.74614	3.40571
1604	12373	GCG	0	1	1	1.99643	0	0.500894	0.500894	0.66627	2.21032
1605	12376	CTG	1	0	1.37604	1.61372	0.726725	0	-0.726725	1	-3.20686
1606	12382	AAG	0	0	0.315963	2.24514	0	0	0	N/A	0
1607	12388	GAG	1	4	0.326375	2.3699	3.06396	1.68783	-1.37613	0.885833	-6.0725
1608	12391	ATT	0	1	0.761227	2.23877	0	0.446673	0.446673	0.746258	1.97106
1609	12394	GAA	0	0	0.266154	2.39183	0	0	0	N/A	0
1610	12397	GCC	0	0	1	2	0	0	0	N/A	0
1611	12400	AAA	0	0	0.266154	2.29494	0	0	0	N/A	0
1612	12406	CTA	0	0	1.39522	1.60478	0	0	0	N/A	0
1613	12409	GAA	0	0	0.266154	2.39183	0	0	0	N/A	0
1614	12412	AAT	1	0	0.395222	2.60478	2.53023	0	-2.53023	1	-11.1653
1615	12415	GAT	0	3	0.39321	2.59811	0	1.15469	1.15469	0.655215	5.09534
1616	12418	GGT	0	0	1	2	0	0	0	N/A	0
1617	12421	TTT	0	0	0.395222	2.60478	0	0	0	N/A	0
1618	12424	GGT	0	1	0.983037	2.01696	0	0.495795	0.495795	0.672321	2.18782
1619	12427	TTA	0	0	0.661376	1.73385	0	0	0	N/A	0
1620	12430	CTA	0	1	1.3947	1.59841	0	0.625622	0.625622	0.53403	2.76072
1621	12433	GAA	1	0	0.267551	2.39043	3.7376	0	-3.7376	1	-16.4931
1622	12445	TCG	1	0	1	1.63441	1	0	-1	1	-4.41275
1623	12448	GCT	0	2	0.994395	2.0056	0	0.997205	0.997205	0.446939	4.40042
1624	12451	TCT	0	1	0.997665	2	0	0.5	0.5	0.667186	2.20637
1625	12454	TGT	0	3	0.395222	2.32299	0	1.29144	1.29144	0.624155	5.6988
1626	12457	TTC	0	1	0.398311	2.59812	0	0.384894	0.384894	0.867072	1.69844
1627	12460	AGC	0	0	0.395222	2.60478	0	0	0	N/A	0
1628	12463	TCG	0	0	1	1.63489	0	0	0	N/A	0
1629	12466	GTA	0	0	1	2	0	0	0	N/A	0
1630	12469	GAA	0	0	0.266154	2.39183	0	0	0	N/A	0
1631	12472	ACA	0	1	0.994674	2.00214	0	0.499465	0.499465	0.66809	2.20402
1632	12475	AAA	0	1	0.268205	2.29289	0	0.43613	0.43613	0.895277	1.92453
1633	12481	TTT	0	0	0.395222	2.60478	0	0	0	N/A	0
1634	12484	TCC	0	0	1	2	0	0	0	N/A	0
1635	12490	GGA	0	0	1	1.65798	0	0	0	N/A	0
1636	12493	TCC	0	0	1	2	0	0	0	N/A	0
1637	12496	CAC	0	3	0.401646	2.57279	0	1.16605	1.16605	0.647141	5.14549
1638	12499	GAG	0	0	0.315963	2.34202	0	0	0	N/A	0
1639	12508	AGA	0	0	0.561098	2	0	0	0	N/A	0
1640	12511	AAT	0	0	0.395222	2.60478	0	0	0	N/A	0
1641	12514	AGG	0	0	0.610906	2.38909	0	0	0	N/A	0
1642	12517	GAA	0	0	0.266154	2.39183	0	0	0	N/A	0
1643	12520	CGA	0	0	1.36511	1.23967	0	0	0	N/A	0
1644	12523	AGT	0	0	0.395222	2.60478	0	0	0	N/A	0
1645	12526	AAC	0	0	0.395222	2.60478	0	0	0	N/A	0
1646	12538	GAC	0	0	0.395222	2.60478	0	0	0	N/A	0
1647	12544	AAA	0	0	0.266154	2.29494	0	0	0	N/A	0
1648	12547	GAT	0	0	0.395222	2.60478	0	0	0	N/A	0
1649	12550	TTG	0	2	0.640599	2.07585	0	0.963458	0.963458	0.583969	4.2515
1650	12553	ATA	1	2	0.859726	2.12935	1.16316	0.939252	-0.223909	0.799408	-0.988056
1651	12556	GAA	0	0	0.266154	2.39183	0	0	0	N/A	0
1652	12559	TCC	1	0	1	2	1	0	-1	1	-4.41275
1653	12562	CCC	0	1	1	2	0	0.5	0.5	0.666667	2.20637
1654	12565	TCT	0	0	1	2	0	0	0	N/A	0
1655	12568	TCT	0	0	1	2	0	0	0	N/A	0
1656	12571	AGA	0	1	0.562352	2.00193	0	0.499518	0.499518	0.780698	2.20425
1657	12574	GGG	0	0	1	2	0	0	0	N/A	0
1658	12577	ATC	0	0	0.760334	2.23967	0	0	0	N/A	0
1659	12580	ATC	0	0	0.760334	2.23967	0	0	0	N/A	0
1660	12586	AAA	0	0	0.266154	2.29494	0	0	0	N/A	0
1661	12589	GCA	2	0	1	2	2	0	-2	1	-8.8255
1662	12592	AGT	0	1	0.395222	2.60478	0	0.38391	0.38391	0.868259	1.6941
1663	12595	AGC	0	0	0.395222	2.60478	0	0	0	N/A	0
1664	12598	TTT	0	0	0.395222	2.60478	0	0	0	N/A	0
1665	12601	AGA	0	0	0.561098	2	0	0	0	N/A	0
1666	12604	TGC	0	0	0.395222	2.23967	0	0	0	N/A	0
1667	12607	ATT	0	0	0.760334	2.23967	0	0	0	N/A	0
1668	12610	CGT	0	1	0.995966	2.0016	0	0.499601	0.499601	0.667742	2.20461
1669	12613	AAA	0	0	0.266154	2.29494	0	0	0	N/A	0
1670	12625	CAT	0	0	0.395222	2.60478	0	0	0	N/A	0
1671	12628	AGA	0	0	0.561098	2	0	0	0	N/A	0
1672	12631	TGT	0	1	0.395222	2.23876	0	0.446675	0.446675	0.849953	1.97107
1673	12634	TAT	0	0	0.395222	2	0	0	0	N/A	0
1674	12637	GGA	0	0	1	1.65798	0	0	0	N/A	0
1675	12640	TCT	0	0	1	2	0	0	0	N/A	0
1676	12643	CAT	0	3	0.414154	2.58585	0	1.16016	1.16016	0.640389	5.1195
1677	12658	TTT	0	1	0.397871	2.60213	0	0.384301	0.384301	0.867376	1.69582
1678	12661	CTC	0	3	0.97832	2.02168	0	1.48391	1.48391	0.306037	6.54814
1679	12670	GAA	0	1	0.266154	2.38911	0	0.418566	0.418566	0.899764	1.84703
1680	12673	TAC	1	0	0.395222	2	2.53023	0	-2.53023	1	-11.1653
1681	12676	ATA	1	1	0.725878	2.26646	1.37764	0.441216	-0.936426	0.941156	-4.13221
1682	12679	GAT	0	1	0.395222	2.60478	0	0.38391	0.38391	0.868259	1.6941
1683	12682	CTT	0	1	0.98908	2.01092	0	0.497285	0.497285	0.670307	2.19439
1684	12685	CCA	0	0	1	2	0	0	0	N/A	0
1685	12691	AGG	0	0	0.610906	2.38909	0	0	0	N/A	0
1686	12694	AGC	0	0	0.395222	2.60478	0	0	0	N/A	0
1687	12697	CGA	0	0	1.36511	1.23967	0	0	0	N/A	0
1688	12700	ATG	0	0	0	3	0	0	0	N/A	0
1689	12703	AAA	0	0	0.266154	2.29494	0	0	0	N/A	0
1690	12706	CCA	0	2	0.99306	2.0032	0	0.998401	0.998401	0.446982	4.4057
1691	12709	AAA	0	0	0.266154	2.29494	0	0	0	N/A	0
1692	12712	TCT	0	2	0.841772	2.03173	0	0.984385	0.984385	0.499929	4.34384
1693	12715	CAT	0	0	0.395222	2.60478	0	0	0	N/A	0
1694	12718	GTT	0	0	1	2	0	0	0	N/A	0
1695	12721	CGG	0	0	1.36511	1.63489	0	0	0	N/A	0
1696	12724	TTT	0	0	0.395222	2.60478	0	0	0	N/A	0
1697	12730	ATT	0	0	0.760334	2.23967	0	0	0	N/A	0
1698	12733	AGA	0	0	0.561098	2	0	0	0	N/A	0
1699	12736	GAT	0	0	0.395222	2.60478	0	0	0	N/A	0
1700	12739	GTT	0	0	1	2	0	0	0	N/A	0
1701	12745	AAT	0	0	0.395222	2.60478	0	0	0	N/A	0
1702	12748	GAT	0	0	0.395222	2.60478	0	0	0	N/A	0
1703	12751	CAA	0	1	0.266154	2.33837	0	0.427648	0.427648	0.897811	1.8871
1704	12754	CCA	1	1	0.987196	2.00591	1.01297	0.498527	-0.514442	0.891216	-2.27011
1705	12757	ACG	0	0	1	2	0	0	0	N/A	0
1706	12760	TCG	0	0	1	1.63489	0	0	0	N/A	0
1707	12763	ACT	0	0	1	2	0	0	0	N/A	0
1708	12766	ATA	0	0	0.733846	2.26615	0	0	0	N/A	0
1709	12769	ACC	0	0	1	2	0	0	0	N/A	0
1710	12772	CCT	0	0	1	2	0	0	0	N/A	0
1711	12775	AGC	0	0	0.395222	2.60478	0	0	0	N/A	0
1712	12778	CTT	0	0	1	2	0	0	0	N/A	0
1713	12781	CCA	0	0	1	2	0	0	0	N/A	0
1714	12784	AGC	0	0	0.395222	2.60478	0	0	0	N/A	0
1715	12790	CGA	0	0	1.36511	1.23967	0	0	0	N/A	0
1716	12793	TGC	0	0	0.395222	2.23967	0	0	0	N/A	0
1717	12796	GGG	0	0	1	2	0	0	0	N/A	0
1718	12799	TTC	0	0	0.395222	2.60478	0	0	0	N/A	0
1719	12802	GAT	0	0	0.395222	2.60478	0	0	0	N/A	0
1720	12805	TCC	0	0	1	2	0	0	0	N/A	0
1721	12808	CGC	0	0	1	2	0	0	0	N/A	0
1722	12811	TAC	0	0	0.395222	2	0	0	0	N/A	0
1723	12814	CCG	0	0	1	2	0	0	0	N/A	0
1724	12817	CTA	0	0	1.39522	1.60478	0	0	0	N/A	0
1725	12820	TAT	0	0	0.395222	2	0	0	0	N/A	0
1726	12823	ATT	0	0	0.760334	2.23967	0	0	0	N/A	0
1727	12826	CAT	0	2	0.521723	2.47828	0	0.807012	0.807012	0.682428	3.56114
1728	12841	ACT	1	0	1	2	1	0	-1	1	-4.41275
1729	12844	TCA	0	0	1	1.39522	0	0	0	N/A	0
1730	12847	TAT	0	0	0.395222	2	0	0	0	N/A	0
1731	12850	GAT	0	1	0.395222	2.60478	0	0.38391	0.38391	0.868259	1.6941
1732	12961	AGG	0	1	0.599674	2.40033	0	0.41661	0.41661	0.800109	1.8384
1733	12964	AAT	0	1	0.395222	2.60478	0	0.38391	0.38391	0.868259	1.6941
1734	12976	CCA	1	1	1.00242	1.99758	0.997584	0.500606	-0.496977	0.88835	-2.19304
1735	12979	TTG	1	1	0.71698	1.92686	1.39474	0.51898	-0.875759	0.926456	-3.86451
1736	12982	TCT	0	1	0.98888	2.01112	0	0.497235	0.497235	0.670373	2.19418
1737	12985	AAT	0	1	0.401935	2.59807	0	0.384902	0.384902	0.866022	1.69848
1738	12988	GGA	0	0	1	1.65798	0	0	0	N/A	0
1739	12994	GAC	0	0	0.395222	2.60478	0	0	0	N/A	0
1740	12997	AGA	0	0	0.561098	2	0	0	0	N/A	0
1741	13000	GGT	0	0	1	2	0	0	0	N/A	0
1742	13003	CTT	0	0	1	2	0	0	0	N/A	0
1743	13006	CTA	0	0	1.39522	1.60478	0	0	0	N/A	0
1744	13009	AAC	0	0	0.395222	2.60478	0	0	0	N/A	0
1745	13012	CTT	0	0	1	2	0	0	0	N/A	0
1746	13015	TGG	0	0	0	2.36807	0	0	0	N/A	0
1747	13018	TAT	0	0	0.395222	2	0	0	0	N/A	0
1748	13021	AGG	0	0	0.610906	2.38909	0	0	0	N/A	0
1749	13024	TTC	0	0	0.395222	2.60478	0	0	0	N/A	0
1750	13027	AAA	0	0	0.266154	2.29494	0	0	0	N/A	0
1751	13030	TCC	0	0	1	2	0	0	0	N/A	0
1752	13033	TAT	0	0	0.395222	2	0	0	0	N/A	0
1753	13036	TGG	0	0	0	2.36807	0	0	0	N/A	0
1754	13039	ACG	0	0	1	2	0	0	0	N/A	0
1755	13042	CAA	0	0	0.266154	2.33862	0	0	0	N/A	0
1756	13045	TTT	0	0	0.395222	2.60478	0	0	0	N/A	0
1757	13048	ATT	0	5	0.786163	2.21384	0	2.25852	2.25852	0.218837	9.9663
1758	13051	TCT	1	0	1	2	1	0	-1	1	-4.41275
1759	13054	ATA	2	0	0.73954	2.26046	2.70438	0	-2.70438	1	-11.9338
1760	13057	TAT	0	0	0.395222	2	0	0	0	N/A	0
1761	13060	CTA	1.16667	1.83333	1.38789	1.61014	0.840605	1.13862	0.298011	0.613046	1.31505
1762	13075	TCT	0	0	1	2	0	0	0	N/A	0
1763	13078	AGA	0	2	0.56393	2.00436	0	0.997823	0.997823	0.609065	4.40314
1764	13087	GAG	0	2	0.316872	2.34503	0	0.852866	0.852866	0.776091	3.76348
1765	13090	AAT	0	0	0.395222	2.60478	0	0	0	N/A	0
1766	13117	AAA	0	0	0.266154	2.29494	0	0	0	N/A	0
1767	13120	GAA	0	1	0.266154	2.37156	0	0.421663	0.421663	0.899097	1.86069
1768	13126	CTC	2	0	1.01109	1.98891	1.97807	0	-1.97807	1	-8.72874
1769	13129	TAT	0	3	0.415892	2.01696	0	1.48738	1.48738	0.56983	6.56346
1770	13189	CAG	1	0	0.315777	2.289	3.16679	0	-3.16679	1	-13.9743
1771	13192	AAA	0	0	0.266154	2.29494	0	0	0	N/A	0
1772	13207	TTT	0	0	0.395222	2.60478	0	0	0	N/A	0
1773	13210	ATC	0	2	0.831619	2.16838	0	0.922347	0.922347	0.522431	4.07009
1774	13249	AAA	2	0	0.267415	2.29368	7.47901	0	-7.47901	1	-33.003
1775	13252	AAT	3	2	0.395222	2.60478	7.59068	0.76782	-6.82286	0.998653	-30.1076
1776	13255	GAT	0	1	0.395222	2.60478	0	0.38391	0.38391	0.868259	1.6941
1777	13258	CCT	2	0	1	2	2	0	-2	1	-8.8255
1778	13261	TTT	0	0	0.395222	2.60478	0	0	0	N/A	0
1779	13282	ATG	0	2	0.0192475	2.98075	0	0.670972	0.670972	0.98721	2.96083
1780	13285	TTT	0	0	0.395222	2.60478	0	0	0	N/A	0
1781	13288	GTT	0	0	1	2	0	0	0	N/A	0
1782	13312	AGT	0	1	0.395222	2.60478	0	0.38391	0.38391	0.868259	1.6941
1783	13315	AGA	0	0	0.561098	2	0	0	0	N/A	0
1784	13321	AGT	0	0	0.395222	2.60478	0	0	0	N/A	0
1785	13324	TCG	0	0	1	1.63489	0	0	0	N/A	0
1786	13327	ATC	0	1	0.767056	2.23294	0	0.447839	0.447839	0.744315	1.9762
1787	13333	TCC	0	0	1	2	0	0	0	N/A	0
1788	13339	ATA	1	0	0.734589	2.26541	1.36131	0	-1.36131	1	-6.0071
1789	13342	GCT	0	0	1	2	0	0	0	N/A	0
1790	13345	TCT	0	0	1	2	0	0	0	N/A	0
1791	13348	CTC	0	0	1	2	0	0	0	N/A	0
1792	13351	AAA	0	0	0.266154	2.29494	0	0	0	N/A	0
1793	13354	AGG	0	0	0.610906	2.38909	0	0	0	N/A	0
1794	13357	GTT	0	1	0.949869	2.05013	0	0.487774	0.487774	0.683377	2.15242
1795	13360	TCA	0	0	1	1.39522	0	0	0	N/A	0
1796	13363	GCT	0	0	1	2	0	0	0	N/A	0
1797	13366	TCT	0	0	1	2	0	0	0	N/A	0
1798	13369	TCG	0	0	1	1.63489	0	0	0	N/A	0
1799	13372	GTG	0	0	1	2	0	0	0	N/A	0
1800	13375	AAT	0	0	0.395222	2.60478	0	0	0	N/A	0
1801	13378	ATC	0	0	0.760334	2.23967	0	0	0	N/A	0
1802	13381	TTG	1	0	0.709787	1.91838	1.40887	0	-1.40887	1	-6.217
1803	13384	GTA	0	0	1	2	0	0	0	N/A	0
1804	13387	GAA	0	0	0.266154	2.39183	0	0	0	N/A	0
1805	13390	GAT	0	0	0.395222	2.60478	0	0	0	N/A	0
1806	13393	AGA	1	2	0.572777	2.02105	1.74588	0.989586	-0.756295	0.875247	-3.33734
1807	13396	ATT	2	0	0.760334	2.23967	2.63042	0	-2.63042	1	-11.6074
1808	13399	TCT	0	0	1	2	0	0	0	N/A	0
1809	13405	AAT	0	0	0.395222	2.60478	0	0	0	N/A	0
1810	13408	TTA	0	2	0.604963	1.91845	0	1.04251	1.04251	0.577995	4.60034
1811	13411	GGT	0	0	1	2	0	0	0	N/A	0
1812	13414	TTA	0	1	0.656732	1.74904	0	0.571742	0.571742	0.727018	2.52295
1813	13417	TTC	0	0	0.395222	2.60478	0	0	0	N/A	0
1814	13420	TTT	0	0	0.395222	2.60478	0	0	0	N/A	0
1815	13423	GTT	0	0	1	2	0	0	0	N/A	0
1816	13426	AAG	0	0	0.315963	2.24514	0	0	0	N/A	0
1817	13432	GTA	0	0	1	2	0	0	0	N/A	0
1818	13435	CGT	0	0	1	2	0	0	0	N/A	0
1819	13438	AAC	0	0	0.395222	2.60478	0	0	0	N/A	0
1820	13441	CCA	0	0	1	2	0	0	0	N/A	0
1821	13444	ACG	0	0	1	2	0	0	0	N/A	0
1822	13447	AGA	0	0	0.561098	2	0	0	0	N/A	0
1823	13450	AAT	0	0	0.395222	2.60478	0	0	0	N/A	0
1824	13453	TTC	0	1	0.521723	2.47828	0	0.403506	0.403506	0.826092	1.78057
1825	13456	TTT	0	0	0.395222	2.60478	0	0	0	N/A	0
1826	13459	ACC	0	0	1	2	0	0	0	N/A	0
1827	13462	TGT	0	0	0.395222	2.23967	0	0	0	N/A	0
1828	13465	CCA	1	0	1	2	1	0	-1	1	-4.41275
1829	13468	ATT	0	0	0.760334	2.23967	0	0	0	N/A	0
1830	13471	TCT	0	0	1	2	0	0	0	N/A	0
1831	13474	AAC	1	1	0.394373	2.60274	2.53567	0.38421	-2.15146	0.982686	-9.49386
1832	13477	GCA	0	1	1	2	0	0.5	0.5	0.666667	2.20637
1833	13480	TCA	0	0	1	1.39522	0	0	0	N/A	0
1834	13483	AGA	0	0	0.561098	2	0	0	0	N/A	0
1835	13486	TAT	0	0	0.395222	2	0	0	0	N/A	0
1836	13489	CCA	0	0	1	2	0	0	0	N/A	0
1837	13492	TTT	1	0	0.395222	2.60478	2.53023	0	-2.53023	1	-11.1653
1838	13495	GTT	0	0	1	2	0	0	0	N/A	0
1839	13498	CCG	0	0	1	2	0	0	0	N/A	0
1840	13501	GTG	0	0	1	2	0	0	0	N/A	0
1841	13507	ATA	0	0	0.733846	2.26615	0	0	0	N/A	0
1842	13510	GTA	0	0	1	2	0	0	0	N/A	0
1843	13513	GCT	0	0	1	2	0	0	0	N/A	0
1844	13516	ATC	0	1	0.764515	2.23548	0	0.44733	0.44733	0.745162	1.97396
1845	13522	TCT	0	0	1	2	0	0	0	N/A	0
1846	13525	TCC	0	0	1	2	0	0	0	N/A	0
1847	13528	ACC	0	0	1	2	0	0	0	N/A	0
1848	13531	GCG	0	0	1	2	0	0	0	N/A	0
1849	13534	AGA	0	0	0.561098	2	0	0	0	N/A	0
1850	13537	GGG	0	0	1	2	0	0	0	N/A	0
1851	13540	TCT	0	0	1	2	0	0	0	N/A	0
1852	13543	GAT	0	0	0.395222	2.60478	0	0	0	N/A	0
1853	13546	TGG	0	1	0.0071365	2.36576	0	0.422698	0.422698	0.996992	1.86526
1854	13549	GAT	0	0	0.395222	2.60478	0	0	0	N/A	0
1855	13552	TGT	0	0	0.395222	2.23967	0	0	0	N/A	0
1856	13555	TTG	0	1	0.70783	1.93093	0	0.517884	0.517884	0.731757	2.28529
1857	13558	AGC	0	0	0.395222	2.60478	0	0	0	N/A	0
1858	13561	AAC	2	0	0.395222	2.60478	5.06045	0	-5.06045	1	-22.3305
1859	13564	TCA	0	0	1	1.39522	0	0	0	N/A	0
1860	13567	CGT	0	0	1	2	0	0	0	N/A	0
1861	13570	AAT	0	0	0.395222	2.60478	0	0	0	N/A	0
1862	13573	CGT	0	0	1	2	0	0	0	N/A	0
1863	13579	CCT	0	0	1	2	0	0	0	N/A	0
1864	13582	CTT	0	0	1	2	0	0	0	N/A	0
1865	13585	GCC	0	0	1	2	0	0	0	N/A	0
1866	13588	AAT	0	0	0.395222	2.60478	0	0	0	N/A	0
1867	13594	TTC	0	0	0.395222	2.60478	0	0	0	N/A	0
1868	13600	GTA	0	0	1	2	0	0	0	N/A	0
1869	13603	GCT	0	0	1	2	0	0	0	N/A	0
1870	13606	TTA	0	0	0.661376	1.73385	0	0	0	N/A	0
1871	13609	TCT	0	0	1	2	0	0	0	N/A	0
1872	13612	AGA	0	0	0.561098	2	0	0	0	N/A	0
1873	13615	TCA	0	0	1	1.39522	0	0	0	N/A	0
1874	13618	GAA	0	0	0.266154	2.39183	0	0	0	N/A	0
1875	13621	GCA	0	1	0.986507	2.0072	0	0.498205	0.498205	0.670473	2.19846
1876	13624	AAT	0	0	0.395222	2.60478	0	0	0	N/A	0
1877	13627	TGT	0	0	0.395222	2.23967	0	0	0	N/A	0
1878	13630	GCA	0	0	1	2	0	0	0	N/A	0
1879	13633	AAG	0	0	0.315963	2.24514	0	0	0	N/A	0
1880	13636	GCT	0	0	1	2	0	0	0	N/A	0
1881	13639	TCT	0	0	1	2	0	0	0	N/A	0
1882	13642	AAT	1	0	0.395222	2.60478	2.53023	0	-2.53023	1	-11.1653
1883	13645	TCT	0	0	1	2	0	0	0	N/A	0
1884	13648	GCA	0	0	1	2	0	0	0	N/A	0
1885	13651	AAT	0	0	0.395222	2.60478	0	0	0	N/A	0
1886	13657	GCT	0	0	1	2	0	0	0	N/A	0
1887	13660	AGT	0	0	0.395222	2.60478	0	0	0	N/A	0
1888	13663	TCC	0	0	1	2	0	0	0	N/A	0
1889	13666	AAT	0	0	0.395222	2.60478	0	0	0	N/A	0
1890	13669	TTT	0	0	0.395222	2.60478	0	0	0	N/A	0
1891	13672	AAT	0	2	0.395222	2.60478	0	0.76782	0.76782	0.753875	3.3882
1892	13675	TTG	1	0	0.710285	1.92028	1.40789	0	-1.40789	1	-6.21265
1893	13678	CCA	1	0	1	2	1	0	-1	1	-4.41275
1894	13681	GCT	0	0	1	2	0	0	0	N/A	0
1895	13684	ACT	0	0	1	2	0	0	0	N/A	0
1896	13687	TGT	0	0	0.395222	2.23967	0	0	0	N/A	0
1897	13690	TTC	0	0	0.395222	2.60478	0	0	0	N/A	0
1898	13693	ATA	0	1	0.502135	2.49786	0	0.400342	0.400342	0.832622	1.76661
1899	13696	GCT	0	0	1	2	0	0	0	N/A	0
1900	13699	TTA	0	0	0.661376	1.73385	0	0	0	N/A	0
1901	13702	ATT	0	0	0.760334	2.23967	0	0	0	N/A	0
1902	13708	GCT	0	0	1	2	0	0	0	N/A	0
1903	13711	GCC	0	0	1	2	0	0	0	N/A	0
1904	13714	GAT	0	0	0.395222	2.60478	0	0	0	N/A	0
1905	13717	CCT	0	0	1	2	0	0	0	N/A	0
1906	13720	ACT	0	0	1	2	0	0	0	N/A	0
1907	13723	CTA	1	0	1.39522	1.60478	0.716732	0	-0.716732	1	-3.16276
1908	13726	GAA	0	0	0.266154	2.39183	0	0	0	N/A	0
1909	13729	ACA	0	0	1	2	0	0	0	N/A	0
1910	13732	GAA	0	0	0.266154	2.39183	0	0	0	N/A	0
1911	13735	ATA	0	0	0.733846	2.26615	0	0	0	N/A	0
1912	13738	CCT	0	0	1	2	0	0	0	N/A	0
1913	13741	ACA	0	0	1	2	0	0	0	N/A	0
1914	13744	TTA	0	0	0.661376	1.73385	0	0	0	N/A	0
1915	13747	ATA	0	0	0.733846	2.26615	0	0	0	N/A	0
1916	13750	GCA	0	0	1	2	0	0	0	N/A	0
1917	13753	GGC	0	0	1	2	0	0	0	N/A	0
1918	13756	CTT	6	0	1.37514	1.62486	4.3632	0	-4.3632	1	-19.2537
1919	13759	ATT	0	0	0.760334	2.23967	0	0	0	N/A	0
1920	13762	CCA	0	0	1	2	0	0	0	N/A	0
1921	13765	GCA	0	0	1	2	0	0	0	N/A	0
1922	13768	TTG	0	0	0.711184	1.9237	0	0	0	N/A	0
1923	13771	AAT	0	2	0.39372	2.59796	0	0.769834	0.769834	0.75411	3.39708
1924	13774	AGA	0	0	0.561098	2	0	0	0	N/A	0
1925	13777	TCG	1	0	1	1.63148	1	0	-1	1	-4.41275
1926	13780	GCA	0	0	1	2	0	0	0	N/A	0
1927	13783	GAT	0	0	0.395222	2.60478	0	0	0	N/A	0
1928	13786	AAG	2	0	0.31481	2.24629	6.35303	0	-6.35303	1	-28.0343
1929	13789	AAT	0	0	0.395222	2.60478	0	0	0	N/A	0
1930	13792	ATT	0	0	0.760334	2.23967	0	0	0	N/A	0
1931	13795	TGT	0	0	0.395222	2.23967	0	0	0	N/A	0
1932	13798	CCA	0	0	1	2	0	0	0	N/A	0
1933	13801	TCT	0	0	1	2	0	0	0	N/A	0
1934	13804	GTA	0	0	1	2	0	0	0	N/A	0
1935	13807	ATA	0	0	0.733846	2.26615	0	0	0	N/A	0
1936	13810	GAA	0	0	0.266154	2.39183	0	0	0	N/A	0
1937	13813	ATT	0	0	0.760334	2.23967	0	0	0	N/A	0
1938	13816	ACA	0	0	1	2	0	0	0	N/A	0
1939	13819	TTA	0	0	0.661376	1.73385	0	0	0	N/A	0
1940	13822	GTA	0	0	1	2	0	0	0	N/A	0
1941	13825	GGA	0	0	1	1.65798	0	0	0	N/A	0
1942	13828	ATA	0	0	0.733846	2.26615	0	0	0	N/A	0
1943	13834	GCC	0	0	1	2	0	0	0	N/A	0
1944	13837	GAA	0	0	0.266154	2.39183	0	0	0	N/A	0
1945	13840	ACG	1	0	1	2	1	0	-1	1	-4.41275
1946	13843	TCT	0	0	1	2	0	0	0	N/A	0
1947	13846	CCA	0	0	1	2	0	0	0	N/A	0
1948	13849	GAT	0	0	0.395222	2.60478	0	0	0	N/A	0
1949	13855	GTC	0	0	1	2	0	0	0	N/A	0
1950	13858	TCC	0	0	1	2	0	0	0	N/A	0
1951	13861	ACT	0	0	1	2	0	0	0	N/A	0
1952	13864	ATT	0	0	0.760334	2.23967	0	0	0	N/A	0
1953	13867	GGT	0	0	1	2	0	0	0	N/A	0
1954	13870	AAA	0	0	0.266154	2.29494	0	0	0	N/A	0
1955	13873	GCA	0	0	1	2	0	0	0	N/A	0
1956	13876	GTC	0	0	1	2	0	0	0	N/A	0
1957	13879	ATA	0	0	0.733846	2.26615	0	0	0	N/A	0
1958	13882	CTT	0	0	1	2	0	0	0	N/A	0
1959	13885	CCT	0	0	1	2	0	0	0	N/A	0
1960	13888	TCA	0	0	1	1.39522	0	0	0	N/A	0
1961	13891	CCT	0	0	1	2	0	0	0	N/A	0
1962	13894	AAA	0	0	0.266154	2.29494	0	0	0	N/A	0
1963	13897	CGA	0	0	1.36511	1.23967	0	0	0	N/A	0
1964	13900	GAA	0	0	0.266154	2.39183	0	0	0	N/A	0
1965	13903	CTT	0	0	1	2	0	0	0	N/A	0
1966	13906	AAT	0	1	0.395222	2.60478	0	0.38391	0.38391	0.868259	1.6941
1967	13909	TTA	0	0	0.661376	1.73385	0	0	0	N/A	0
1968	13912	GCG	1	0	1	2	1	0	-1	1	-4.41275
1969	13915	GCT	0	0	1	2	0	0	0	N/A	0
1970	13918	CTT	0	0	1	2	0	0	0	N/A	0
1971	13921	TCC	0	0	1	2	0	0	0	N/A	0
1972	13924	AAA	0	0	0.266154	2.29494	0	0	0	N/A	0
1973	13927	AGT	0	1	0.440336	2.55966	0	0.390676	0.390676	0.853221	1.72396
1974	13930	CGT	0	0	1	2	0	0	0	N/A	0
1975	13933	GAA	0	0	0.266154	2.39183	0	0	0	N/A	0
1976	13936	TGC	0	0	0.395222	2.23967	0	0	0	N/A	0
1977	13939	AAA	0	0	0.266154	2.29494	0	0	0	N/A	0
1978	13945	AAA	0	0	0.266154	2.29494	0	0	0	N/A	0
1979	13948	ACA	0	0	1	2	0	0	0	N/A	0
1980	13951	TCT	0	0	1	2	0	0	0	N/A	0
1981	13954	CCT	0	0	1	2	0	0	0	N/A	0
1982	13957	GGA	0	0	1	1.65798	0	0	0	N/A	0
1983	13963	GCT	0	0	1	2	0	0	0	N/A	0
1984	13966	TCA	0	0	1	1.39522	0	0	0	N/A	0
1985	13969	CGA	0	0	1.36511	1.23967	0	0	0	N/A	0
1986	13972	CCA	3	0	1	2	3	0	-3	1	-13.2382
1987	13975	GGG	1	0	1	1.99403	1	0	-1	1	-4.41275
1988	13978	GGT	1	0	1	2	1	0	-1	1	-4.41275
1989	13981	CTT	0	0	1	2	0	0	0	N/A	0
1990	13984	CTT	0	0	1	2	0	0	0	N/A	0
1991	13987	AAT	0	0	0.395222	2.60478	0	0	0	N/A	0
1992	13990	AGA	0	0	0.561098	2	0	0	0	N/A	0
1993	13993	AGA	0	1	0.526402	2.1265	0	0.470256	0.470256	0.801575	2.07512
1994	13996	GAC	0	0	0.395222	2.60478	0	0	0	N/A	0
1995	13999	ATT	0	0	0.760334	2.23967	0	0	0	N/A	0
1996	14005	CGA	0	0	1.36511	1.23967	0	0	0	N/A	0
1997	14011	GCT	0	0	1	2	0	0	0	N/A	0
1998	14014	TGG	0	1	0.124791	2.32753	0	0.42964	0.42964	0.949113	1.89589
1999	14017	GCC	0	0	1	2	0	0	0	N/A	0
[truncated: 34,199 more rows]
